# Supplementary material for: Viral peptide conjugates for metal-warhead delivery to chromatin
Source: Royal Society of Chemistry journal article supplement (doi:10.1039/d4ra01617c), 2024-01-01
Supplement: d4ra01617c1.pdf [file d4ra01617c1.pdf]

*ELECTRONIC SUPPLEMENTARY INFORMATION*

**Viral Peptide Conjugates for Metal-Warhead Delivery to Chromatin**

Lucinda K. Batchelor, Louis De Falco, Paul J. Dyson and Curtis A. Davey

CONTENTS

Experimental details (synthesis): pages 2–11

1 Scheme: page 12

3 Tables: pages 13–15

14 Figures: pages 16–34

## SYNTHESIS & CHARACTERIZATION OF AU(I)-PEPTIDE CONJUGATES

### Compound 1

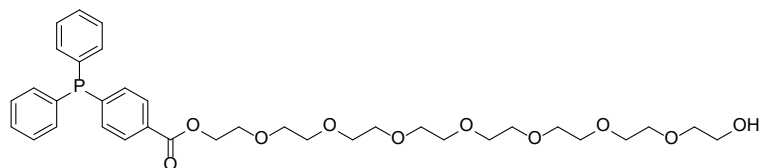

4-(Diphenylphosphino)benzoic acid (1.50 g, 4.90 mmol, 1 equiv.) and *N*-ethyl-*N'*-(3-dimethylaminopropyl)carbodiimide hydrochloride (1.22 g, 6.37 mmol, 1.3 equiv.) were dissolved in dry CH<sub>2</sub>Cl<sub>2</sub> (10 mL) and stirred under N<sub>2</sub> at room temperature for 2 h. The solution was added dropwise to a solution of octaethylene glycol (2.72 g, 7.35 mmol, 1.5 equiv.) and 4-(dimethylamino)pyridine (0.30 g, 2.44 mmol, 0.5 equiv.) in dry CH<sub>2</sub>Cl<sub>2</sub> (5 mL) and the reaction stirred under N<sub>2</sub> at room temperature for 20 h. The reaction mixture was washed with brine (100 mL), dried over anhydrous sodium sulphate, filtered and concentrated under reduced pressure. Purification was achieved via flash column chromatography using an eluent system of CH<sub>2</sub>Cl<sub>2</sub>/CH<sub>3</sub>OH. The product was washed with hexane (3 x 15 mL) and isolated as a colorless oil (1.55 g, 2.35 mmol, 48%).

**Elemental Analysis (%):** calcd for C<sub>35</sub>H<sub>47</sub>O<sub>10</sub>P.C<sub>6</sub>H<sub>14</sub> C 66.11 H 8.25, found C 66.31 H 8.02.

**<sup>1</sup>H NMR (CDCl<sub>3</sub>, 400 MHz):** 7.96-7.98 (2H, m, 2xO-(C=O)-(Ar)C-CH-CH-C-P), 7.30-7.36 (12H, m, 2xO-(C=O)-(Ar)C-CH-CH-C-P, 4xP-(Ar)C-CH-CH-CH, 4xP-(Ar)C-CH-CH-CH, 2xP-(Ar)C-CH-CH-CH), 4.44-4.46 (2H, m, Ar-(C=O)-O-CH<sub>2</sub>-CH<sub>2</sub>-O), 3.79-3.82 (2H, m, Ar-(C=O)-O-CH<sub>2</sub>-CH<sub>2</sub>-O), 3.58-3.72 (28H, m, Ar-(C=O)-O-(CH<sub>2</sub>)<sub>2</sub>-O-(CH<sub>2</sub>)<sub>2</sub>, Ar-(C=O)-O-((CH<sub>2</sub>)<sub>2</sub>-O)<sub>2</sub>-O-(CH<sub>2</sub>)<sub>2</sub>, Ar-(C=O)-O-((CH<sub>2</sub>)<sub>2</sub>-O)<sub>3</sub>-(CH<sub>2</sub>)<sub>2</sub>, Ar-(C=O)-O-((CH<sub>2</sub>)<sub>2</sub>-O)<sub>4</sub>-(CH<sub>2</sub>)<sub>2</sub>, Ar-(C=O)-O-((CH<sub>2</sub>)<sub>2</sub>-O)<sub>5</sub>-(CH<sub>2</sub>)<sub>2</sub>, Ar-(C=O)-O-((CH<sub>2</sub>)<sub>2</sub>-O)<sub>6</sub>-(CH<sub>2</sub>)<sub>2</sub>, Ar-(C=O)-O-((CH<sub>2</sub>)<sub>2</sub>-O)<sub>7</sub>-(CH<sub>2</sub>)<sub>2</sub>-OH).

**<sup>31</sup>P {<sup>1</sup>H} NMR (CDCl<sub>3</sub>, 162 MHz):** -5.08 (1P).

**<sup>13</sup>C {<sup>1</sup>H} NMR (CDCl<sub>3</sub>, 101 MHz):** 165.4 (1C, O-(C=O)-(Ar)C-CH-CH-C-P), 143.2 (1C, d, O-(C=O)-(Ar)C-CH-CH-C-P, <sup>1</sup>J<sub>C,P</sub> = 14 Hz), 135.2 (2C, d, 2xP-(Ar)C-CH-CH-CH, <sup>1</sup>J<sub>C,P</sub> = 11 Hz), 133.0 (4C, d, 4xP-(Ar)C-CH-CH-CH, <sup>2</sup>J<sub>C,P</sub> = 20 Hz), 132.2 (2C, d, 2xO-(C=O)-(Ar)C-CH-CH-C-P, <sup>2</sup>J<sub>C,P</sub> = 19 Hz), 129.1 (1C, O-(C=O)-(Ar)C-CH-CH-C-P), 128.5 (2C, d, 2xO-(C=O)-(Ar)C-CH-CH-C-P, <sup>3</sup>J<sub>C,P</sub> = 6 Hz), 128.2 (2C, 2xP-(Ar)C-CH-CH-CH), 127.4 (4C, d, 4xP-(Ar)C-CH-CH-CH, <sup>3</sup>J<sub>C,P</sub> = 7 Hz), 71.6 (1C, O-CH<sub>2</sub>-

CH<sub>2</sub>-OH), 69.41-69.77 (12C, *Ar*-(C=O)-O-(CH<sub>2</sub>)<sub>2</sub>-O-(CH<sub>2</sub>)<sub>2</sub>, *Ar*-(C=O)-O-((CH<sub>2</sub>)<sub>2</sub>-O)<sub>2</sub>-O-(CH<sub>2</sub>)<sub>2</sub>, *Ar*-(C=O)-O-((CH<sub>2</sub>)<sub>2</sub>-O)<sub>3</sub>-(CH<sub>2</sub>)<sub>2</sub>, *Ar*-(C=O)-O-((CH<sub>2</sub>)<sub>2</sub>-O)<sub>4</sub>-(CH<sub>2</sub>)<sub>2</sub>, *Ar*-(C=O)-O-((CH<sub>2</sub>)<sub>2</sub>-O)<sub>5</sub>-(CH<sub>2</sub>)<sub>2</sub>, *Ar*-(C=O)-O-((CH<sub>2</sub>)<sub>6</sub>-O)<sub>2</sub>-(CH<sub>2</sub>)<sub>2</sub>), 68.3 (1C, (*Ar*)-(C=O)-O-CH<sub>2</sub>-CH<sub>2</sub>-O), 63.3 (1C, (*Ar*)-(C=O)-O-CH<sub>2</sub>-CH<sub>2</sub>-O), 60.8 (1C, O-CH<sub>2</sub>-CH<sub>2</sub>-OH).

**HRMS (ESI(+)-QTOF):** *m/z* found 681.2808 [M+Na]<sup>+</sup> C<sub>35</sub>H<sub>47</sub>O<sub>10</sub>PNa<sup>+</sup> calculated 681.2805.

## **Compound 2**

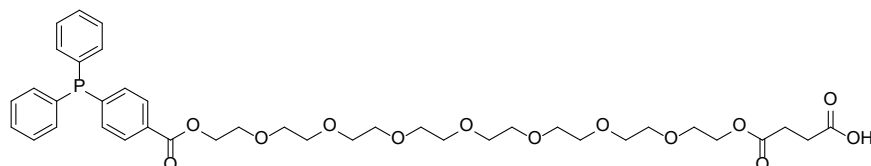

**Compound 1** (1.200 g, 1.823 mmol, 1 equiv.) and succinic anhydride (0.274 g, 2.735 mmol, 1.5 equiv.) were dissolved in CH<sub>2</sub>Cl<sub>2</sub> (5 mL). Triethylamine (0.553 g, 5.46 mmol, 0.76 mL, 3 equiv.) was added and the reaction stirred for 1 hour at r.t. under N<sub>2</sub>. Purification was achieved via flash column chromatography using an eluent system of CH<sub>2</sub>Cl<sub>2</sub>/CH<sub>3</sub>OH and the product was washed with pentane (3 x 15 mL) and isolated as a colorless oil (0.661 g, 0.871 mmol, 48 %).

**Elemental Analysis (%):** calcd for C<sub>39</sub>H<sub>51</sub>O<sub>13</sub>P.<sup>3/4</sup>C<sub>5</sub>H<sub>12</sub> C 63.16 H 7.44 found C 62.90 H 7.73.

**<sup>1</sup>H NMR (CDCl<sub>3</sub>, 400 MHz):** 7.94-7.96 (2H, m, 2xO-(C=O)-(Ar)C-CH-CH-C-P), 7.27-7.40 (12H, m, 2xO-(C=O)-(Ar)C-CH-CH-C-P, 4xP-(Ar)C-CH-CH-CH, 4xP-(Ar)C-CH-CH-CH, 2xP-(Ar)C-CH-CH-CH), 4.42-4.44 (2H, m, *Ar*-(C=O)-O-CH<sub>2</sub>-CH<sub>2</sub>-O), 4.18-4.44 (2H, m, CH<sub>2</sub>-O-(C=O)-(CH<sub>2</sub>)<sub>2</sub>-(C=O)-OH), 3.79-3.81 (2H, m, *Ar*-(C=O)-O-CH<sub>2</sub>-CH<sub>2</sub>-O), 3.59-3.67 (26H, m, *Ar*-(C=O)-O-(CH<sub>2</sub>)<sub>2</sub>-O-(CH<sub>2</sub>)<sub>2</sub>, *Ar*-(C=O)-O-((CH<sub>2</sub>)<sub>2</sub>-O)<sub>2</sub>-O-(CH<sub>2</sub>)<sub>2</sub>, *Ar*-(C=O)-O-((CH<sub>2</sub>)<sub>2</sub>-O)<sub>3</sub>-(CH<sub>2</sub>)<sub>2</sub>, *Ar*-(C=O)-O-((CH<sub>2</sub>)<sub>2</sub>-O)<sub>4</sub>-(CH<sub>2</sub>)<sub>2</sub>, *Ar*-(C=O)-O-((CH<sub>2</sub>)<sub>2</sub>-O)<sub>5</sub>-(CH<sub>2</sub>)<sub>2</sub>, *Ar*-(C=O)-O-((CH<sub>2</sub>)<sub>6</sub>-O)<sub>2</sub>-(CH<sub>2</sub>)<sub>2</sub>, *Ar*-(C=O)-O-((CH<sub>2</sub>)<sub>2</sub>-O)<sub>7</sub>-CH<sub>2</sub>), 2.60 (4H, s, O-(C=O)-(CH<sub>2</sub>)<sub>2</sub>-(C=O)-O);

**<sup>31</sup>P {<sup>1</sup>H} NMR (CDCl<sub>3</sub>, 162 MHz):** -5.08 (1P).

**<sup>13</sup>C {<sup>1</sup>H} NMR (CDCl<sub>3</sub>, 101 MHz):** 173.9 (1C, O-(C=O)-(CH<sub>2</sub>)<sub>2</sub>-(C=O)-OH), 172.1 (1C, O-(C=O)-(CH<sub>2</sub>)<sub>2</sub>-(C=O)-OH), 166.0 (1C, O-(C=O)-(Ar)C-CH-CH-C-P), 143.9 (1C, d, O-(C=O)-(Ar)C-CH-CH-C-P, <sup>1</sup>J<sub>C,P</sub> = 14 Hz), 135.8 (2C, d, 2xP-(Ar)C-CH-CH-CH, <sup>1</sup>J<sub>C,P</sub> = 11 Hz), 133.6 (4C, d, 4xP-(Ar)C-CH-CH-CH, <sup>2</sup>J<sub>C,P</sub> = 20 Hz), 132.8 (2C, d,

2xO-(C=O)-(Ar)C-CH-CH-C-P,  $^2J_{C,P} = 19$  Hz), 129.7 (1C, O-(C=O)-(Ar)C-CH-CH-C-P), 129.1 (2C, d, 2xO-(C=O)-(Ar)C-CH-CH-C-P,  $^3J_{C,P} = 6$  Hz), 128.9 (2C, 2xP-(Ar)C-CH-CH-CH), 128.4 (4C, d, 4xP-(Ar)C-CH-CH-CH,  $^3J_{C,P} = 7$  Hz), 70.15-70.36 (12C, Ar-(C=O)-O-(CH<sub>2</sub>)<sub>2</sub>-O-(CH<sub>2</sub>)<sub>2</sub>, Ar-(C=O)-O-((CH<sub>2</sub>)<sub>2</sub>-O)<sub>2</sub>-O-(CH<sub>2</sub>)<sub>2</sub>, Ar-(C=O)-O-((CH<sub>2</sub>)<sub>2</sub>-O)<sub>3</sub>-(CH<sub>2</sub>)<sub>2</sub>, Ar-(C=O)-O-((CH<sub>2</sub>)<sub>2</sub>-O)<sub>4</sub>-(CH<sub>2</sub>)<sub>2</sub>, Ar-(C=O)-O-((CH<sub>2</sub>)<sub>2</sub>-O)<sub>5</sub>-(CH<sub>2</sub>)<sub>2</sub>, Ar-(C=O)-O-((CH<sub>2</sub>)<sub>6</sub>-O)<sub>2</sub>-(CH<sub>2</sub>)<sub>2</sub>), 68.9 (1C, Ar-(C=O)-O-CH<sub>2</sub>-CH<sub>2</sub>-O), 68.7 (1C, CH<sub>2</sub>-CH<sub>2</sub>-O-(C=O)-(CH<sub>2</sub>)<sub>2</sub>-(C=O)-OH), 64.0 (1C, Ar-(C=O)-O-CH<sub>2</sub>-CH<sub>2</sub>-O), 63.4 (1C, CH<sub>2</sub>-O-(C=O)-(CH<sub>2</sub>)<sub>2</sub>-(C=O)-OH), 29.1 (2C, O-(C=O)-(CH<sub>2</sub>)<sub>2</sub>-(C=O)-O);.

**HRMS (ESI(+)-QTOF):** *m/z* found 781.2966 [M+Na]<sup>+</sup> C<sub>39</sub>H<sub>51</sub>O<sub>13</sub>PNa<sup>+</sup> calculated 781.2965.

### **Compound 3**

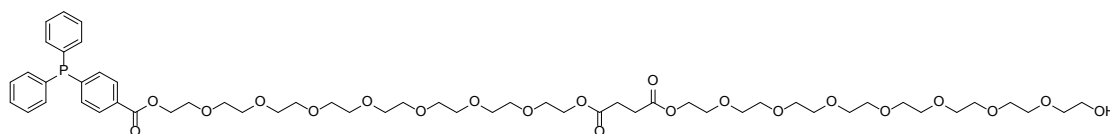

**Compound 2** (0.660 g, 0.870 mmol, 1 equiv.) and *N*-ethyl-*N'*-(3-dimethylaminopropyl)carbodiimide hydrochloride (0.217 g, 1.131 mmol, 1.3 equiv.) were dissolved in dry CH<sub>2</sub>Cl<sub>2</sub> (10 mL) and stirred under N<sub>2</sub> at room temperature for 2 h. The solution was added dropwise to a solution of octaethylene glycol (0.450 g, 1.218 mmol, 1.4 equiv.) and 4-(dimethylamino)pyridine (0.053 g, 0.435 mmol, 0.5 equiv.) in dry CH<sub>2</sub>Cl<sub>2</sub> (5 mL) and the reaction stirred under N<sub>2</sub> at r.t. for 17 h. The reaction mixture was washed with brine (50 mL), dried over anhydrous sodium sulphate, filtered and concentrated under reduced pressure. Purification was achieved via flash column chromatography using an eluent system of CH<sub>2</sub>Cl<sub>2</sub>/CH<sub>3</sub>OH and the product was isolated as a colorless oil (0.695 g, 0.625 mmol, 72 %).

**Elemental Analysis (%):** calcd for C<sub>55</sub>H<sub>83</sub>O<sub>21</sub>P C 59.45 H 7.53; found C 59.71 H 7.71.

**<sup>1</sup>H NMR (CDCl<sub>3</sub>, 400 MHz):** 7.95-7.97 (2H, m, 2xO-(C=O)-(Ar)C-CH-CH-C-P), 7.29-7.36 (12H, m, 2xO-(C=O)-(Ar)C-CH-CH-C-P, 4xP-(Ar)C-CH-CH-CH, 4xP-(Ar)C-CH-CH-CH, 2xP-(Ar)C-CH-CH-CH), 4.43-4.46 (2H, m, Ar-(C=O)-O-CH<sub>2</sub>-CH<sub>2</sub>-O), 4.21-4.24 (4H, m, CH<sub>2</sub>-O-(C=O)-(CH<sub>2</sub>)<sub>2</sub>-(C=O)-O-CH<sub>2</sub>), 3.79-3.81 (2H, m, Ar-(C=O)-O-CH<sub>2</sub>-CH<sub>2</sub>-O), 3.59-3.69 (56H, m, Ar-(C=O)-O-(CH<sub>2</sub>)<sub>2</sub>-O-(CH<sub>2</sub>)<sub>2</sub>, Ar-(C=O)-O-((CH<sub>2</sub>)<sub>2</sub>-O)<sub>2</sub>-(CH<sub>2</sub>)<sub>2</sub>, Ar-(C=O)-O-((CH<sub>2</sub>)<sub>2</sub>-O)<sub>3</sub>-(CH<sub>2</sub>)<sub>2</sub>, Ar-(C=O)-O-((CH<sub>2</sub>)<sub>2</sub>-O)<sub>4</sub>-(CH<sub>2</sub>)<sub>2</sub>, Ar-(C=O)-O-((CH<sub>2</sub>)<sub>2</sub>-O)<sub>5</sub>-(CH<sub>2</sub>)<sub>2</sub>, Ar-(C=O)-O-((CH<sub>2</sub>)<sub>2</sub>-O)<sub>6</sub>-(CH<sub>2</sub>)<sub>2</sub>, Ar-(C=O)-O-((CH<sub>2</sub>)<sub>2</sub>-O)<sub>7</sub>-CH<sub>2</sub>, HO-(CH<sub>2</sub>)<sub>2</sub>, HO-(CH<sub>2</sub>)<sub>2</sub>-O-(CH<sub>2</sub>)<sub>2</sub>, HO-((CH<sub>2</sub>)<sub>2</sub>-O)<sub>2</sub>-



(*Ar*)C-CH-CH-CH, 2xP-(*Ar*)C-CH-CH-CH), 4.43-4.45 (2H, m, *Ar*-(C=O)-O-CH<sub>2</sub>-CH<sub>2</sub>-O), 4.17-4.20 (4H, m, CH<sub>2</sub>-O-(C=O)-(CH<sub>2</sub>)<sub>2</sub>-(C=O)-O-CH<sub>2</sub>), 3.77-3.79 (2H, m, *Ar*-(C=O)-O-CH<sub>2</sub>-CH<sub>2</sub>-O), 3.54-3.67 (56H, m, *Ar*-(C=O)-O-(CH<sub>2</sub>)<sub>2</sub>-O-(CH<sub>2</sub>)<sub>2</sub>, *Ar*-(C=O)-O-((CH<sub>2</sub>)<sub>2</sub>-O)<sub>2</sub>-(CH<sub>2</sub>)<sub>2</sub>, *Ar*-(C=O)-O-((CH<sub>2</sub>)<sub>2</sub>-O)<sub>3</sub>-(CH<sub>2</sub>)<sub>2</sub>, *Ar*-(C=O)-O-((CH<sub>2</sub>)<sub>2</sub>-O)<sub>4</sub>-(CH<sub>2</sub>)<sub>2</sub>, *Ar*-(C=O)-O-((CH<sub>2</sub>)<sub>2</sub>-O)<sub>5</sub>-(CH<sub>2</sub>)<sub>2</sub>, *Ar*-(C=O)-O-((CH<sub>2</sub>)<sub>2</sub>-O)<sub>6</sub>-(CH<sub>2</sub>)<sub>2</sub>, *Ar*-(C=O)-O-((CH<sub>2</sub>)<sub>2</sub>-O)<sub>7</sub>-CH<sub>2</sub>, HO-(CH<sub>2</sub>)<sub>2</sub>, HO-(CH<sub>2</sub>)<sub>2</sub>-O-(CH<sub>2</sub>)<sub>2</sub>, HO-((CH<sub>2</sub>)<sub>2</sub>-O)<sub>2</sub>-(CH<sub>2</sub>)<sub>2</sub>, HO-((CH<sub>2</sub>)<sub>2</sub>-O)<sub>3</sub>-(CH<sub>2</sub>)<sub>2</sub>, HO-((CH<sub>2</sub>)<sub>2</sub>-O)<sub>4</sub>-(CH<sub>2</sub>)<sub>2</sub>, HO-((CH<sub>2</sub>)<sub>2</sub>-O)<sub>5</sub>-(CH<sub>2</sub>)<sub>2</sub>, HO-((CH<sub>2</sub>)<sub>2</sub>-O)<sub>6</sub>-(CH<sub>2</sub>)<sub>2</sub>, HO-((CH<sub>2</sub>)<sub>2</sub>-O)<sub>7</sub>-CH<sub>2</sub>), 2.60 (4H, s, O-(C=O)-(CH<sub>2</sub>)<sub>2</sub>-(C=O)-O).

<sup>31</sup>P {<sup>1</sup>H} NMR (CDCl<sub>3</sub>, 162 MHz): 32.97 (Au-P).

<sup>13</sup>C {<sup>1</sup>H} NMR (CDCl<sub>3</sub>, 101 MHz): 172.2 (2C, O-(C=O)-(CH<sub>2</sub>)<sub>2</sub>-(C=O)-O), 165.3 (1C, *Ar*-(C=O)-O), 134.2 (1C, d, O-(C=O)-(*Ar*)C-CH-CH-C-P, <sup>1</sup>J<sub>C,P</sub> = 60 Hz), 134.1 (4C, d, 4xP-(*Ar*)C-CH-CH-CH, <sup>2</sup>J<sub>C,P</sub> = 14 Hz), 133.9 (2C, d, 2xO-(C=O)-(*Ar*)C-CH-CH-C-P, <sup>2</sup>J<sub>C,P</sub> = 14 Hz), 133.2 (1C, d, O-(C=O)-(*Ar*)C-CH-CH-C-P, <sup>4</sup>J<sub>C,P</sub> = 2 Hz), 132.3 (2C, d, 2xO-(C=O)-(*Ar*)C-CH-CH-C-P, <sup>3</sup>J<sub>C,P</sub> = 3 Hz), 130.1 (2C, d, 2xP-(*Ar*)C-CH-CH-CH, <sup>4</sup>J<sub>C,P</sub> = 12 Hz), 129.4 (4C, d, 4xP-(*Ar*)C-CH-CH-CH, <sup>3</sup>J<sub>C,P</sub> = 12 Hz), 127.8 (2C, d, 2xP-(*Ar*)C-CH-CH-CH, <sup>1</sup>J<sub>C,P</sub> = 63 Hz), 72.5 (1C, O-CH<sub>2</sub>-CH<sub>2</sub>-OH), 70.28-70.62 (24H, *Ar*-(C=O)-O-(CH<sub>2</sub>)<sub>2</sub>-O-(CH<sub>2</sub>)<sub>2</sub>, *Ar*-(C=O)-O-((CH<sub>2</sub>)<sub>2</sub>-O)<sub>2</sub>-(CH<sub>2</sub>)<sub>2</sub>, *Ar*-(C=O)-O-((CH<sub>2</sub>)<sub>2</sub>-O)<sub>3</sub>-(CH<sub>2</sub>)<sub>2</sub>, *Ar*-(C=O)-O-((CH<sub>2</sub>)<sub>2</sub>-O)<sub>4</sub>-(CH<sub>2</sub>)<sub>2</sub>, *Ar*-(C=O)-O-((CH<sub>2</sub>)<sub>2</sub>-O)<sub>5</sub>-(CH<sub>2</sub>)<sub>2</sub>, *Ar*-(C=O)-O-((CH<sub>2</sub>)<sub>2</sub>-O)<sub>6</sub>-(CH<sub>2</sub>)<sub>2</sub>, HO-(CH<sub>2</sub>)<sub>2</sub>-O-(CH<sub>2</sub>)<sub>2</sub>, HO-((CH<sub>2</sub>)<sub>2</sub>-O)<sub>2</sub>-(CH<sub>2</sub>)<sub>2</sub>, HO-((CH<sub>2</sub>)<sub>2</sub>-O)<sub>3</sub>-(CH<sub>2</sub>)<sub>2</sub>, HO-((CH<sub>2</sub>)<sub>2</sub>-O)<sub>4</sub>-(CH<sub>2</sub>)<sub>2</sub>, HO-((CH<sub>2</sub>)<sub>2</sub>-O)<sub>5</sub>-(CH<sub>2</sub>)<sub>2</sub>, HO-((CH<sub>2</sub>)<sub>2</sub>-O)<sub>6</sub>-(CH<sub>2</sub>)<sub>2</sub>), 69.0 (3C, *Ar*-(C=O)-O-CH<sub>2</sub>-CH<sub>2</sub>-O, 2xCH<sub>2</sub>-CH<sub>2</sub>-O-(C=O)-(CH<sub>2</sub>)<sub>2</sub>-(C=O)-O), 64.7 (1C, *Ar*-(C=O)-O-CH<sub>2</sub>-CH<sub>2</sub>-O), 63.8 (2C, CH<sub>2</sub>-O-(C=O)-(CH<sub>2</sub>)<sub>2</sub>-(C=O)-O-CH<sub>2</sub>), 61.7 (1C, -O-CH<sub>2</sub>-CH<sub>2</sub>-OH), 29.0 (2C, O-(C=O)-(CH<sub>2</sub>)<sub>2</sub>-(C=O)-O).

HRMS (ESI(+)-QTOF): *m/z* found 694.2166 [M+2Na]<sup>2+</sup> C<sub>55</sub>H<sub>81</sub>AuClO<sub>21</sub>PNa<sub>2</sub><sup>+</sup> calculated 694.2157.

## Compound 5

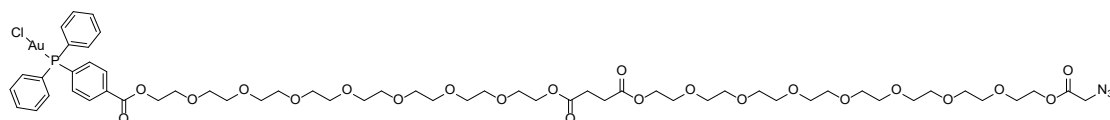

2-azidoacetic acid (0.051 g, 0.521 mmol, 1.2 equiv.) and *N*-ethyl-*N'*-(3-dimethylaminopropyl)carbodiimide hydrochloride (0.122 g, 0.639 mmol, 1.5 equiv.) were dissolved in dry (CH<sub>3</sub>)<sub>2</sub>NCH (5 mL) and stirred under N<sub>2</sub> at room temperature for

1 h. The solution was to a solution of **Compound 4** (0.572 g, 0.426 mmol, 1 equiv.) and 4-(dimethylamino)pyridine (0.026 g, 0.213 mmol, 0.5 equiv.) in dry (CH<sub>3</sub>)<sub>2</sub>NCH (5 mL) and the reaction stirred under N<sub>2</sub> at room temperature for 48 h. The (CH<sub>3</sub>)<sub>2</sub>NCH was removed with N<sub>2</sub> and the crude was dissolved in CH<sub>2</sub>Cl<sub>2</sub> (30 mL), washed with brine (100 mL), dried over anhydrous sodium sulphate, filtered and concentrated under reduced pressure. Purification was achieved via flash column chromatography using an eluent system of CH<sub>2</sub>Cl<sub>2</sub>/CH<sub>3</sub>OH. The product was washed with pentane (3 x 50 mL) and isolated as a yellow-brown oil (0.326 g, 0.229 mmol, 54 %).

(%): calcd for C<sub>57</sub>H<sub>84</sub>AuClN<sub>3</sub>O<sub>22</sub>P. <sup>3/2</sup>C<sub>5</sub>H<sub>12</sub> C 50.63 H 6.78 N 2.73; found C 50.59 H 6.80 N 2.49.

<sup>1</sup>H NMR (CDCl<sub>3</sub>, 400 MHz): 8.08-8.11 (2H, m, 2xO-(C=O)-(Ar)C-CH-CH-C-P), 7.46-7.58 (12H, m, 2xO-(C=O)-(Ar)C-CH-CH-C-P, 4xP-(Ar)C-CH-CH-CH, 4xP-(Ar)C-CH-CH-CH, 2xP-(Ar)C-CH-CH-CH), 4.45-4.47 (2H, m, Ar-(C=O)-O-CH<sub>2</sub>-CH<sub>2</sub>-O), 4.31-4.33 (2H, m, CH<sub>2</sub>-O-(C=O)-CH<sub>2</sub>-N<sub>3</sub>), 4.19-4.22 (4H, m, CH<sub>2</sub>-O-(C=O)-(CH<sub>2</sub>)<sub>2</sub>-(C=O)-O-CH<sub>2</sub>), 3.89 (2H, s, O-(C=O)-CH<sub>2</sub>-N<sub>3</sub>), 3.78-3.81 (2H, m, Ar-(C=O)-O-CH<sub>2</sub>-CH<sub>2</sub>-O), 3.59-3.74 (54H, m, Ar-(C=O)-O-(CH<sub>2</sub>)<sub>2</sub>-O-(CH<sub>2</sub>)<sub>2</sub>, Ar-(C=O)-O-((CH<sub>2</sub>)<sub>2</sub>-O)<sub>2</sub>-(CH<sub>2</sub>)<sub>2</sub>, Ar-(C=O)-O-((CH<sub>2</sub>)<sub>2</sub>-O)<sub>3</sub>-(CH<sub>2</sub>)<sub>2</sub>, Ar-(C=O)-O-((CH<sub>2</sub>)<sub>2</sub>-O)<sub>4</sub>-(CH<sub>2</sub>)<sub>2</sub>, Ar-(C=O)-O-((CH<sub>2</sub>)<sub>2</sub>-O)<sub>5</sub>-(CH<sub>2</sub>)<sub>2</sub>, Ar-(C=O)-O-((CH<sub>2</sub>)<sub>2</sub>-O)<sub>6</sub>-(CH<sub>2</sub>)<sub>2</sub>, Ar-(C=O)-O-((CH<sub>2</sub>)<sub>2</sub>-O)<sub>7</sub>-CH<sub>2</sub>, N<sub>3</sub>-CH<sub>2</sub>-(C=O)-O-CH<sub>2</sub>-CH<sub>2</sub>, N<sub>3</sub>-CH<sub>2</sub>-(C=O)-O-(CH<sub>2</sub>)<sub>2</sub>-O-(CH<sub>2</sub>)<sub>2</sub>, N<sub>3</sub>-CH<sub>2</sub>-(C=O)-O-((CH<sub>2</sub>)<sub>2</sub>-O)<sub>2</sub>-(CH<sub>2</sub>)<sub>2</sub>, N<sub>3</sub>-CH<sub>2</sub>-(C=O)-O-((CH<sub>2</sub>)<sub>2</sub>-O)<sub>3</sub>-(CH<sub>2</sub>)<sub>2</sub>, N<sub>3</sub>-CH<sub>2</sub>-(C=O)-O-((CH<sub>2</sub>)<sub>2</sub>-O)<sub>4</sub>-(CH<sub>2</sub>)<sub>2</sub>, N<sub>3</sub>-CH<sub>2</sub>-(C=O)-O-((CH<sub>2</sub>)<sub>2</sub>-O)<sub>5</sub>-(CH<sub>2</sub>)<sub>2</sub>, N<sub>3</sub>-CH<sub>2</sub>-(C=O)-O-((CH<sub>2</sub>)<sub>2</sub>-O)<sub>6</sub>-(CH<sub>2</sub>)<sub>2</sub>, N<sub>3</sub>-CH<sub>2</sub>-(C=O)-O-((CH<sub>2</sub>)<sub>2</sub>-O)<sub>7</sub>-CH<sub>2</sub>), 2.62 (4H, s, O-(C=O)-(CH<sub>2</sub>)<sub>2</sub>-(C=O)-O).

<sup>31</sup>P {<sup>1</sup>H} NMR (CDCl<sub>3</sub>, 162 MHz): 33.00 (Au-P).

<sup>13</sup>C {<sup>1</sup>H} NMR (CDCl<sub>3</sub>, 101 MHz): 172.3 (2C, O-(C=O)-(CH<sub>2</sub>)<sub>2</sub>-(C=O)-O), 168.4 (1C, O-(C=O)-CH<sub>2</sub>-N<sub>3</sub>), 165.4 (1C, Ar-(C=O)-O), 134.3 (1C, d, O-(C=O)-(Ar)C-CH-CH-C-P, <sup>1</sup>J<sub>C,P</sub> = 60 Hz), 134.2 (4C, d, 4xP-(Ar)C-CH-CH-CH, <sup>2</sup>J<sub>C,P</sub> = 14 Hz), 133.9 (2C, d, 2xO-(C=O)-(Ar)C-CH-CH-C-P, <sup>2</sup>J<sub>C,P</sub> = 14 Hz), 133.3 (1C, d, O-(C=O)-(Ar)C-CH-CH-C-P, <sup>4</sup>J<sub>C,P</sub> = 2 Hz), 132.4 (2C, d, 2xO-(C=O)-(Ar)C-CH-CH-C-P, <sup>3</sup>J<sub>C,P</sub> = 3 Hz), 130.2 (2C, d, 2xP-(Ar)C-CH-CH-CH, <sup>4</sup>J<sub>C,P</sub> = 12 Hz), 129.5 (4C, d, 4xP-(Ar)C-CH-CH-CH, <sup>3</sup>J<sub>C,P</sub> = 12 Hz), 127.9 (2C, d, 2xP-(Ar)C-CH-CH-CH, <sup>1</sup>J<sub>C,P</sub> = 63 Hz), 70.58-70.69 (25C, Ar-(C=O)-O-(CH<sub>2</sub>)<sub>2</sub>-O-(CH<sub>2</sub>)<sub>2</sub>, Ar-(C=O)-O-((CH<sub>2</sub>)<sub>2</sub>-O)<sub>2</sub>-(CH<sub>2</sub>)<sub>2</sub>, Ar-(C=O)-O-((CH<sub>2</sub>)<sub>2</sub>-O)<sub>3</sub>-(CH<sub>2</sub>)<sub>2</sub>, Ar-(C=O)-O-((CH<sub>2</sub>)<sub>2</sub>-O)<sub>4</sub>-(CH<sub>2</sub>)<sub>2</sub>, Ar-(C=O)-O-((CH<sub>2</sub>)<sub>2</sub>-O)<sub>5</sub>-(CH<sub>2</sub>)<sub>2</sub>, Ar-(C=O)-O-((CH<sub>2</sub>)<sub>2</sub>-O)<sub>6</sub>-(CH<sub>2</sub>)<sub>2</sub>, N<sub>3</sub>-CH<sub>2</sub>-(C=O)-O-CH<sub>2</sub>-CH<sub>2</sub>, N<sub>3</sub>-CH<sub>2</sub>-

(C=O)-O-(CH<sub>2</sub>)<sub>2</sub>-O-(CH<sub>2</sub>)<sub>2</sub>, N<sub>3</sub>-CH<sub>2</sub>-(C=O)-O-((CH<sub>2</sub>)<sub>2</sub>-O)<sub>2</sub>-(CH<sub>2</sub>)<sub>2</sub>, N<sub>3</sub>-CH<sub>2</sub>-(C=O)-O-((CH<sub>2</sub>)<sub>2</sub>-O)<sub>3</sub>-(CH<sub>2</sub>)<sub>2</sub>, N<sub>3</sub>-CH<sub>2</sub>-(C=O)-O-((CH<sub>2</sub>)<sub>2</sub>-O)<sub>4</sub>-(CH<sub>2</sub>)<sub>2</sub>, N<sub>3</sub>-CH<sub>2</sub>-(C=O)-O-((CH<sub>2</sub>)<sub>2</sub>-O)<sub>5</sub>-(CH<sub>2</sub>)<sub>2</sub>, N<sub>3</sub>-CH<sub>2</sub>-(C=O)-O-((CH<sub>2</sub>)<sub>2</sub>-O)<sub>6</sub>-(CH<sub>2</sub>)<sub>2</sub>, 69.1 (3C, (*Ar*-(C=O)-O-CH<sub>2</sub>-CH<sub>2</sub>-O)<sub>2</sub> × CH<sub>2</sub>-CH<sub>2</sub>-O-(C=O)-(CH<sub>2</sub>)<sub>2</sub>-(C=O)-O), 68.8 (1C, CH<sub>2</sub>-O-(C=O)-CH<sub>2</sub>-N<sub>3</sub>), 64.7 (1C, (*Ar*-(C=O)-O-CH<sub>2</sub>-CH<sub>2</sub>-O), 63.9 (2C, CH<sub>2</sub>-O-(C=O)-(CH<sub>2</sub>)<sub>2</sub>-(C=O)-O-CH<sub>2</sub>), 50.28 (1C, N<sub>3</sub>-CH<sub>2</sub>-(C=O)-O), 29.0 (2C, O-(C=O)-(CH<sub>2</sub>)<sub>2</sub>-(C=O)-O).

**HRMS (ESI(+)-QTOF):** *m/z* found 1448.4567 [M+Na]<sup>+</sup> C<sub>57</sub>H<sub>84</sub>AuClN<sub>3</sub>O<sub>22</sub>PNa<sup>+</sup> calculated 1448.4536.

### *Peptides*

The peptides were synthesised on an automated peptide synthesiser (Advanced ChemTech 348Ω parallel peptide synthesiser (AAPPTec)) using standard Fmoc solid phase chemistry on Rink Amide MBHA resin (25 μmol scale, 0.3 mmol/g loading). The amide coupling was performed twice for each for each amino acid (10 equiv.) using base NMM (10 equiv.), HATU (4 equiv.) and HOBT (4 equiv.) with an incubation of 30 minutes. The Fmoc groups were removed by incubating the resin twice with piperidine (6 equiv., 20 % (v/v)) in DMF. The resin was washed 4 times before and 5 times after Fmoc removal with DMF (3 mL). The peptides were capped using a capping mixture of acetic anhydride (5 % (v/v)) and lutidine (6 % (v/v)) in DMF.

The final peptides were deprotected and cleaved from the resin via incubation 90 % TFA, 2.5 % H<sub>2</sub>O, 2.5 % thioanisole, 2.5 % phenol and 2.5 % EDT under agitation for 4 hours at room temperature. The resin was removed by vacuum filtration and the peptides were precipitated with cold diethyl ether (50 mL) at -20 °C. The precipitated peptides were collected via centrifugation, washed with cold diethyl ether (2 x 30 ml) and lyophilised.

Peptides were purified with a HPLC system (Prep LC 2535 HPLC, Waters) using a preparative C18 reverse-phase column (Sunfire™ prep C18 OBD 10 μm, 100 Å, 19x250 mm, Waters) with a flow rate of 20 ml min<sup>-1</sup> and a linear gradient of 10-50% v/v solvent B in 40 min (A: 99.9% v/v H<sub>2</sub>O and 0.1% v/v TFA; B: 99.9% v/v ACN and 0.1% v/v TFA). Fractions containing the desired peptide were lyophilised.



## Peptide L1

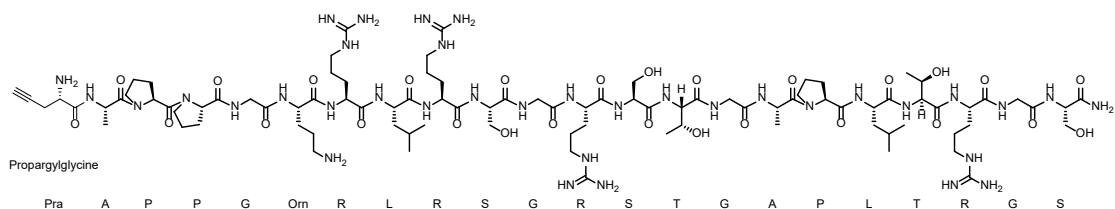

Analytical RP-HPLC: 63.8%.

HRMS (ESI(+)-QTOF):  $m/z$  found 1101.6240  $[M+2H]^{2+}$   $C_{92}H_{162}N_{36}O_{27}^{2+}$  calculated 1101.6205.

## Peptide L2

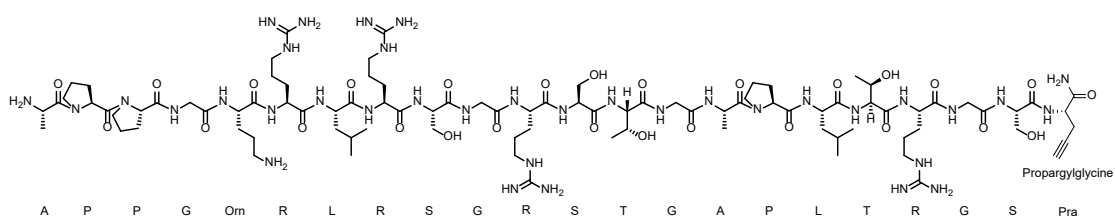

Analytical RP-HPLC: 66.1%.

HRMS (ESI(+)-QTOF):  $m/z$  found 1101.6228  $[M+2H]^{2+}$   $C_{92}H_{162}N_{36}O_{27}^{2+}$  calculated 1101.6205.

## Peptide L3

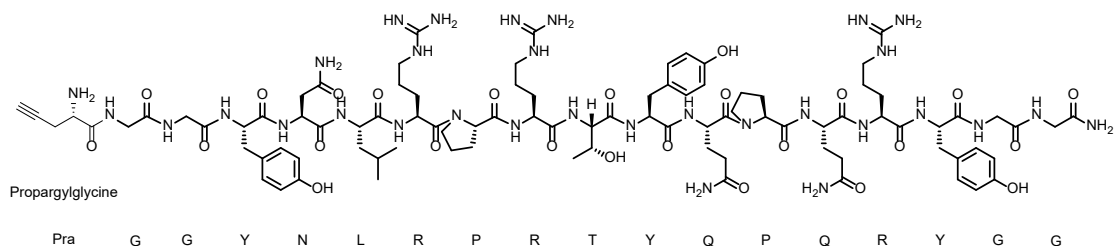

Analytical RP-HPLC: 93.7%.

HRMS (ESI(+)-QTOF):  $m/z$  found 1039.0308  $[M+2H]^{2+}$   $C_{92}H_{139}N_{31}O_{25}^{2+}$  calculated 1039.0280.

## Peptide L4

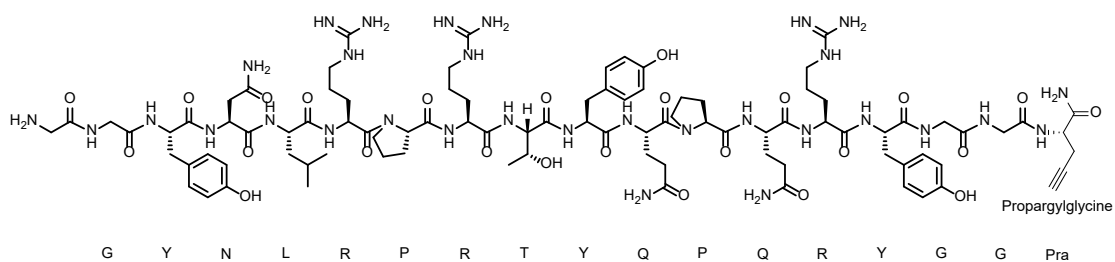

**Analytical RP-HPLC:** 81.4%.

**HRMS (ESI(+)-QTOF):**  $m/z$  found 1039.0299  $[M+2H]^{2+}$   $C_{92}H_{139}N_{31}O_{25}^{2+}$  calculated 1039.0280.

### ***Gold-peptide conjugates***

**Compound 5** (1.1 equiv.) and the appropriate **peptide** (1 equiv.) were dissolved in *tert*-butyl alcohol (2 mL) and milliQ water (2 mL) in the presence of 1 mol % of copper(II) sulphate and 10 mol % of sodium ascorbate. The reaction was stirred vigorously at r.t. under  $N_2$  for 24 h. The solvent was removed with a flow of  $N_2$ . Purification was achieved via preparative HPLC using acetonitrile/water (10 %-45 %) as eluent over 30 minutes. The product was lyophilised and isolated as a white solid.

### **Gold(I)-LANA conjugate: (Au-LANA)**

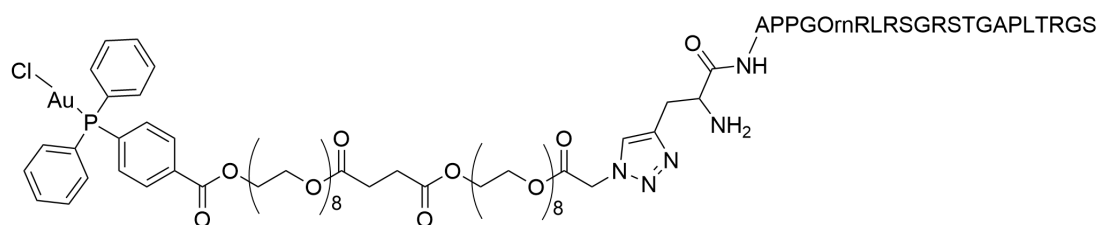

According to the general procedure, **Compound 5** (0.039 g, 0.0275, 1.1 equiv.), **peptide L1** (0.050 g, 0.0227 mmol, 1 equiv.). Yield 16.06 mg, 0.00464 mmol, 20 %.

**Analytical RP-HPLC:** 89.2 %.

**$^{31}P$  { $^1H$ } NMR (100mM NaCl in  $D_2O$ , 162 MHz):** 42.34 (1P).

**HRMS (ESI(+)-QTOF):**  $m/z$  found 898.9393  $[M-Cl+3H]^{4+}$   $C_{149}H_{247}AuN_{39}O_{49}P^{4+}$  calculated 898.9367.

### **Gold(I)-LANA conjugate: (LANA-Au)**

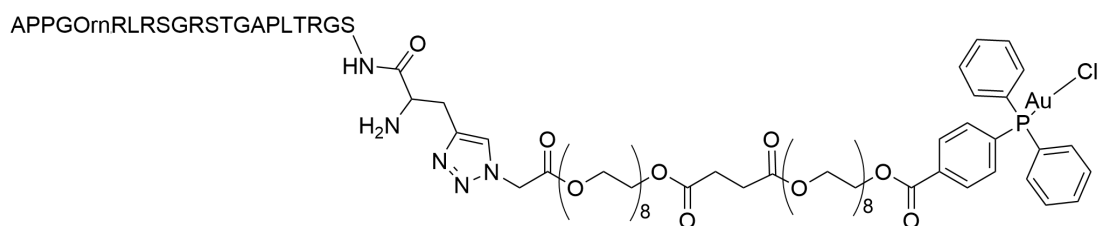

According to the general procedure, **Compound 5** (0.039 g, 0.0275, 1.1 equiv.), **peptide L2** (0.050 g, 0.0227 mmol, 1 equiv.). Yield 21.88 mg, 0.00632 mmol, 28 %.

**Analytical RP-HPLC:** 91.0%.

**$^{31}P$  { $^1H$ } NMR (100mM NaCl in  $D_2O$ , 162 MHz):** 42.67 (1P).

**HRMS (ESI(+)-QTOF):**  $m/z$  found 898.9382  $[M-Cl+3H]^{4+}$   $C_{149}H_{247}AuN_{39}O_{49}P^{4+}$   
calculated 898.9367.

**Gold(I)-GAG conjugate: (Au-GAG)**

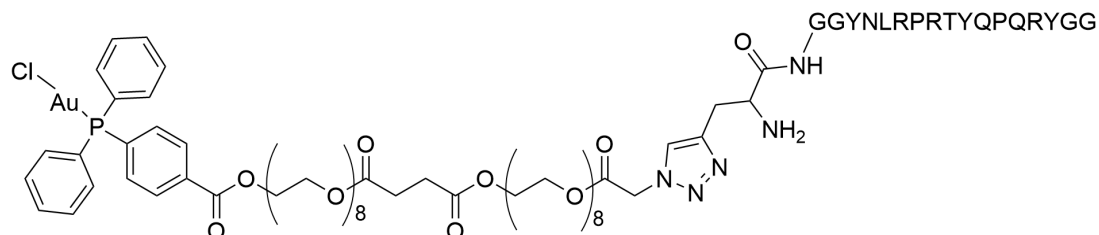

According to the general procedure, **Compound 5** (0.038 g, 0.0265, 1.1 equiv.),  
**peptide L3** (0.050 g, 0.0241 mmol, 1 equiv.). Yield 25.03 mg, 0.00783 mmol, 33 %.  
**Analytical RP-HPLC:** 90.1 %.

**$^{31}P$  { $^1H$ } NMR (100mM NaCl in  $D_2O$ , 162 MHz):** 42.51 (1P).

**HRMS (ESI(+)-QTOF):**  $m/z$  found 867.6437  $[M-Cl+3H]^{4+}$   $C_{149}H_{224}AuN_{34}O_{47}P^{4+}$   
calculated 867.6404.

**Gold(I)-GAG conjugate: (GAG-Au)**

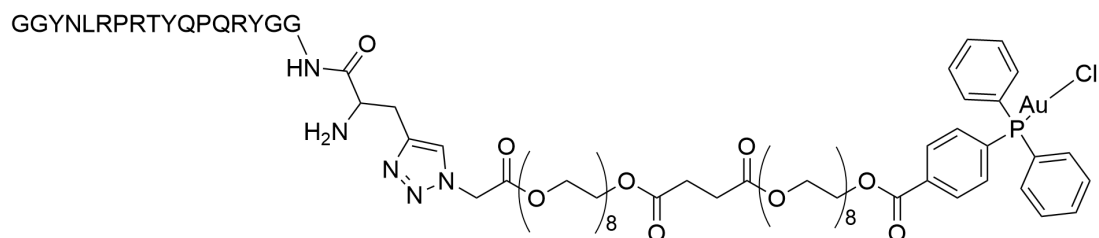

According to the general procedure, **Compound 5** (0.019 g, 0.0132, 1.1 equiv.),  
**Peptide L4** (0.025 g, 0.0120 mmol, 1 equiv.). Yield 24.46 mg, 0.00765 mmol, 64 %.  
**Analytical RP-HPLC:** 85.6 %.

**$^{31}P$  { $^1H$ } NMR (100mM NaCl in  $D_2O$ , 162 MHz):** 42.61 (1P).

**HRMS (ESI(+)-QTOF):**  $m/z$  found 867.6442  $[M-Cl+3H]^{4+}$   $C_{149}H_{224}AuN_{34}O_{47}P^{4+}$   
calculated 867.6404.

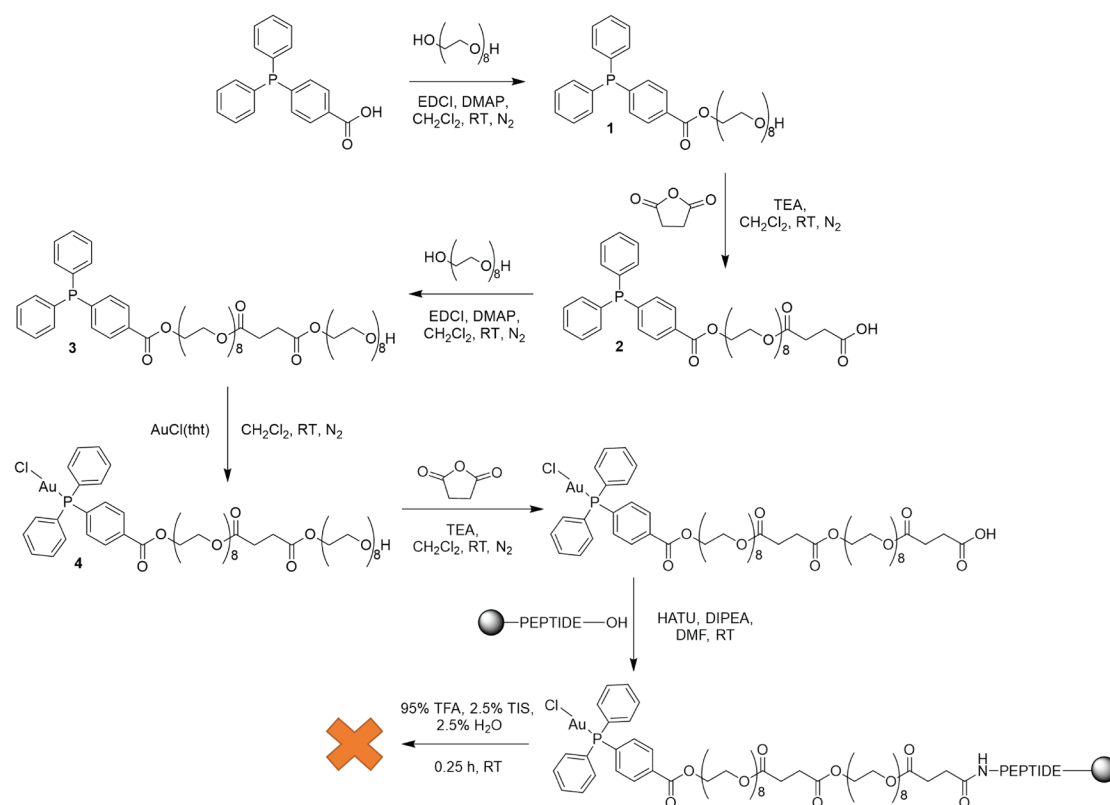

**Scheme S1.** Initial strategy used for the synthesis of the Au-peptide conjugates. As the peptide synthesis was performed using standard Fmoc solid state chemistry, the Au(I) complex could be considered as another amino acid and potentially introduced using typical amide coupling conditions employing 1-[bis(dimethylamino)methylene]-1H-1,2,3-triazolo[4,5-b] pyridinium-3-oxide hexafluorophosphate (HATU) and *N,N*-diisopropylethylamine (DIPEA). However, as the peptide side groups are still present and the N-terminus of the peptide remains attached to the resin, a deprotection step is required. This process is problematic due to the harsh conditions required to detach the peptide from the resin. Typically, 90% trifluoroacetic acid (TFA), 2.5% water, 2.5% phenol, 2.5% ethanedithiol (EDT) and 2.5% thioanisole are used. However, the use of thiol-containing EDT and thioanisole was not advisable as they can react with the gold centre, therefore alternative conditions were used: 95% TFA, 2.5% triisopropylsilane (TIS), and 2.5% water. The resulting Au(I)-peptide conjugates were purified using RP-HPLC and the relevant fractions were lyophilised. However, although the desired products were observed via high resolution mass spectrometry, the peaks were of very low intensity and multiple unidentifiable peaks of greater intensity indicated degradation of the products.

**Table S1.** Data collection and refinement statistics for NCP treated with LANA agents.

|                                                         | <b>LANA</b>                                   | <b>Au-LANA</b>                                | <b>LANA-Au</b>                                |
|---------------------------------------------------------|-----------------------------------------------|-----------------------------------------------|-----------------------------------------------|
| <b>Data collection</b>                                  |                                               |                                               |                                               |
| Space group                                             | P2 <sub>1</sub> 2 <sub>1</sub> 2 <sub>1</sub> | P2 <sub>1</sub> 2 <sub>1</sub> 2 <sub>1</sub> | P2 <sub>1</sub> 2 <sub>1</sub> 2 <sub>1</sub> |
| Cell dimensions                                         |                                               |                                               |                                               |
| <i>a</i> (Å)                                            | 109.71                                        | 108.11                                        | 109.52                                        |
| <i>b</i> (Å)                                            | 109.88                                        | 109.61                                        | 109.45                                        |
| <i>c</i> (Å)                                            | 184.88                                        | 183.77                                        | 184.79                                        |
| Resolution (Å)                                          | 2.50–49.1<br>(2.50–2.64)                      | 2.30–48.9<br>(2.30–2.43)                      | 2.80–49.0<br>(2.80–2.95)                      |
| <i>R</i> <sub>merge</sub> (%)                           | 5.8 (283)                                     | 4.7 (159)                                     | 8.5 (316)                                     |
| <i>R</i> <sub>pim</sub> (%)                             | 1.7 (84.4)                                    | 1.4 (64.2)                                    | 2.5 (102)                                     |
| <i>I</i> / $\sigma$ <i>I</i>                            | 23.0 (1.1)                                    | 27.3 (1.1)                                    | 19.5 (0.8)                                    |
| Completeness (%)                                        | 99.8 (98.9)                                   | 99.9 (99.4)                                   | 99.8 (99.3)                                   |
| CC <sub>1/2</sub> (%)                                   | 100 (66.7)                                    | 100 (65.1)                                    | 100 (60.2)                                    |
| Redundancy                                              | 13.3 (12.7)                                   | 12.2 (7.7)                                    | 13.0 (11.2)                                   |
| <b>Refinement</b>                                       |                                               |                                               |                                               |
| Resolution (Å)                                          | 2.50–49.1                                     | 2.30–48.9                                     | 2.80–49.0                                     |
| No. reflections                                         | 76,005                                        | 95,237                                        | 54,231                                        |
| <i>R</i> <sub>work</sub> / <i>R</i> <sub>free</sub> (%) | 21.8 / 26.8                                   | 22.4 / 26.2                                   | 20.6 / 24.9                                   |
| No. atoms                                               | 12,155                                        | 12,178                                        | 12,155                                        |
| B-factors (Å <sup>2</sup> )                             | 108                                           | 94                                            | 121                                           |
| R.m.s. deviations                                       |                                               |                                               |                                               |
| Bond lengths (Å)                                        | 0.007                                         | 0.007                                         | 0.007                                         |
| Bond angles (°)                                         | 1.50                                          | 1.48                                          | 1.48                                          |
| <b>Validation</b>                                       |                                               |                                               |                                               |
| <i>R</i> <sub>free</sub>                                | 0.268                                         | 0.262                                         | 0.249                                         |
| Clash                                                   | 8                                             | 6                                             | 8                                             |
| Outliers (%)                                            |                                               |                                               |                                               |
| Ramachandran                                            | 0.7                                           | 0.5                                           | 0.8                                           |
| Sidechain                                               | 6.8                                           | 6.3                                           | 6.2                                           |
| RSRZ                                                    | 2.5                                           | 4.3                                           | 1.7                                           |

Single crystal data sets; Values in parentheses are for the highest resolution shell. **LANA**: 15-hour incubation of NCP crystal with a 2 mM concentration of the 21-residue LANA peptide used for the Au(I)-LANA conjugates. **Au-LANA**: 73-hour incubation of NCP crystal with a 1 mM concentration of Au-LANA. **LANA-Au**: 72-hour incubation of NCP crystal with a 1 mM concentration of LANA-Au.

**Table S2.** Data collection and refinement statistics for NCP treated with GAG agents.

|                                                         | <b>GAG</b>                                    | <b>Au-GAG</b>                                 | <b>GAG-Au</b>                                 |
|---------------------------------------------------------|-----------------------------------------------|-----------------------------------------------|-----------------------------------------------|
| <b>Data collection</b>                                  |                                               |                                               |                                               |
| Space group                                             | P2 <sub>1</sub> 2 <sub>1</sub> 2 <sub>1</sub> | P2 <sub>1</sub> 2 <sub>1</sub> 2 <sub>1</sub> | P2 <sub>1</sub> 2 <sub>1</sub> 2 <sub>1</sub> |
| Cell dimensions                                         |                                               |                                               |                                               |
| <i>a</i> (Å)                                            | 107.17                                        | 107.19                                        | 107.66                                        |
| <i>b</i> (Å)                                            | 109.64                                        | 109.56                                        | 109.66                                        |
| <i>c</i> (Å)                                            | 183.56                                        | 183.68                                        | 184.18                                        |
| Resolution (Å)                                          | 2.17–48.8<br>(2.17–2.29)                      | 2.60–48.8<br>(2.60–2.74)                      | 2.49–48.9<br>(2.49–2.63)                      |
| <i>R</i> <sub>merge</sub> (%)                           | 6.4 (186)                                     | 8.6 (198)                                     | 6.4 (211)                                     |
| <i>R</i> <sub>pim</sub> (%)                             | 2.0 (64.2)                                    | 2.6 (66.4)                                    | 1.9 (70.6)                                    |
| <i>I</i> / $\sigma$ <i>I</i>                            | 20.3 (1.2)                                    | 19.6 (1.2)                                    | 25.2 (1.1)                                    |
| Completeness (%)                                        | 98.2 (88.1)                                   | 93.6 (58.9)                                   | 99.2 (95.0)                                   |
| CC <sub>1/2</sub> (%)                                   | 100 (57.3)                                    | 99.9 (56.7)                                   | 100 (46.8)                                    |
| Redundancy                                              | 12.2 (9.7)                                    | 12.5 (9.7)                                    | 12.8 (10.3)                                   |
| <b>Refinement</b>                                       |                                               |                                               |                                               |
| Resolution (Å)                                          | 2.17–48.8                                     | 2.60–48.8                                     | 2.49–48.9                                     |
| No. reflections                                         | 109,713                                       | 61,370                                        | 74,713                                        |
| <i>R</i> <sub>work</sub> / <i>R</i> <sub>free</sub> (%) | 23.6 / 26.9                                   | 21.3 / 26.2                                   | 22.1 / 25.2                                   |
| No. atoms                                               | 12,197                                        | 12,197                                        | 12,197                                        |
| B-factors (Å <sup>2</sup> )                             | 80                                            | 95                                            | 92                                            |
| R.m.s. deviations                                       |                                               |                                               |                                               |
| Bond lengths (Å)                                        | 0.008                                         | 0.008                                         | 0.007                                         |
| Bond angles (°)                                         | 1.50                                          | 1.61                                          | 1.48                                          |
| <b>Validation</b>                                       |                                               |                                               |                                               |
| <i>R</i> <sub>free</sub>                                | 0.269                                         | 0.262                                         | 0.252                                         |
| Clashscore                                              | 6                                             | 9                                             | 7                                             |
| Outliers (%)                                            |                                               |                                               |                                               |
| Ramachandran                                            | 0.7                                           | 1.0                                           | 0.7                                           |
| Side Chain                                              | 7.0                                           | 8.4                                           | 7.2                                           |
| RSRZ                                                    | 4.8                                           | 1.1                                           | 1.9                                           |

Single crystal data sets; Values in parentheses are for the highest resolution shell. **GAG**: 29-hour incubation of NCP crystal with a 2 mM concentration of Au-GAG (short incubation to maximize quality of bound viral peptide model). **Au-GAG**: 91-hour incubation of NCP crystal with a 1 mM concentration of Au-GAG. **GAG-Au**: 72-hour incubation of NCP crystal with a 1 mM concentration of GAG-Au.

**Table S3.** Gold(I) binding sites in NCP treated with the conjugates.

| Conjugate | Anomalous Difference Peak Height ( $\sigma$ ) |      |         |       |
|-----------|-----------------------------------------------|------|---------|-------|
|           | AU1                                           | AU1' | H2B H46 | Depot |
| Au-LANA   | 7.0                                           | 4.8  | --      | 5.0   |
| LANA-Au   | --                                            | --   | --      | 4.2   |
| Au-GAG    | --                                            | 4.5  | 4.3     | 7.1   |
| GAG-Au    | 4.0                                           | --   | --      | 9.0   |

Values correspond to anomalous difference electron density map peak magnitudes  $>3.5\sigma$ .

“Depot” refers to what is apparently residual, unreacted AuDPPBX (gold group), which is likely akin to depot binding.

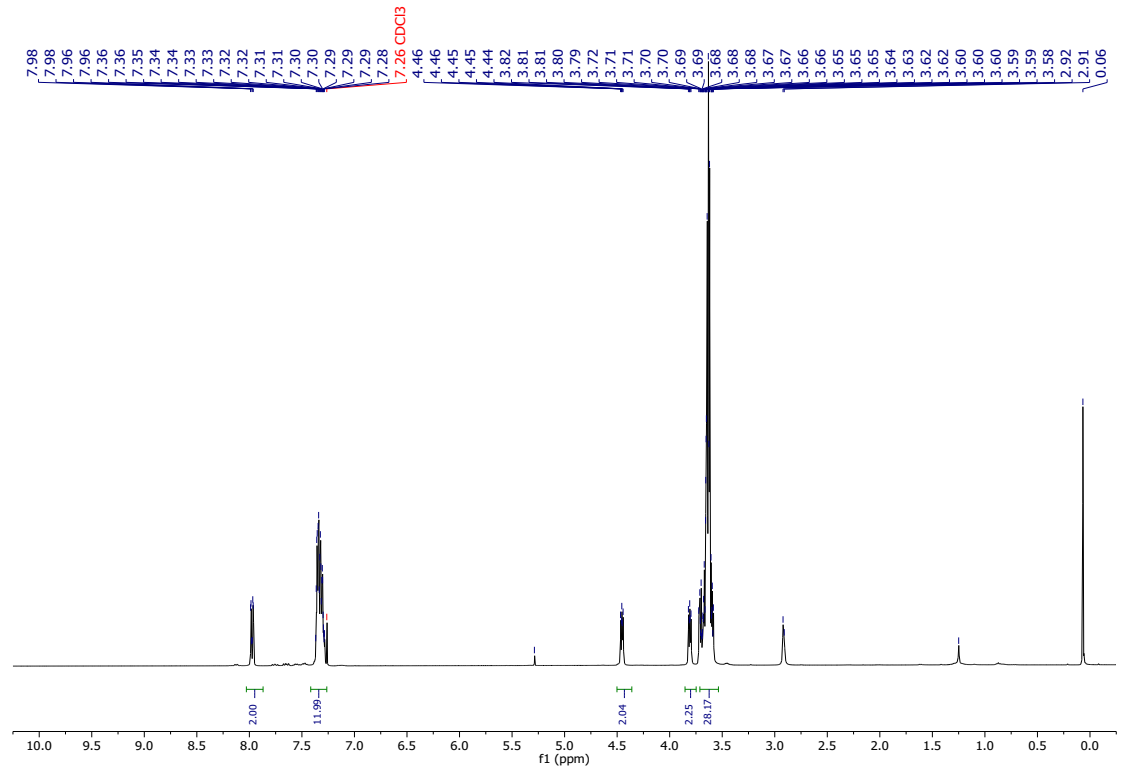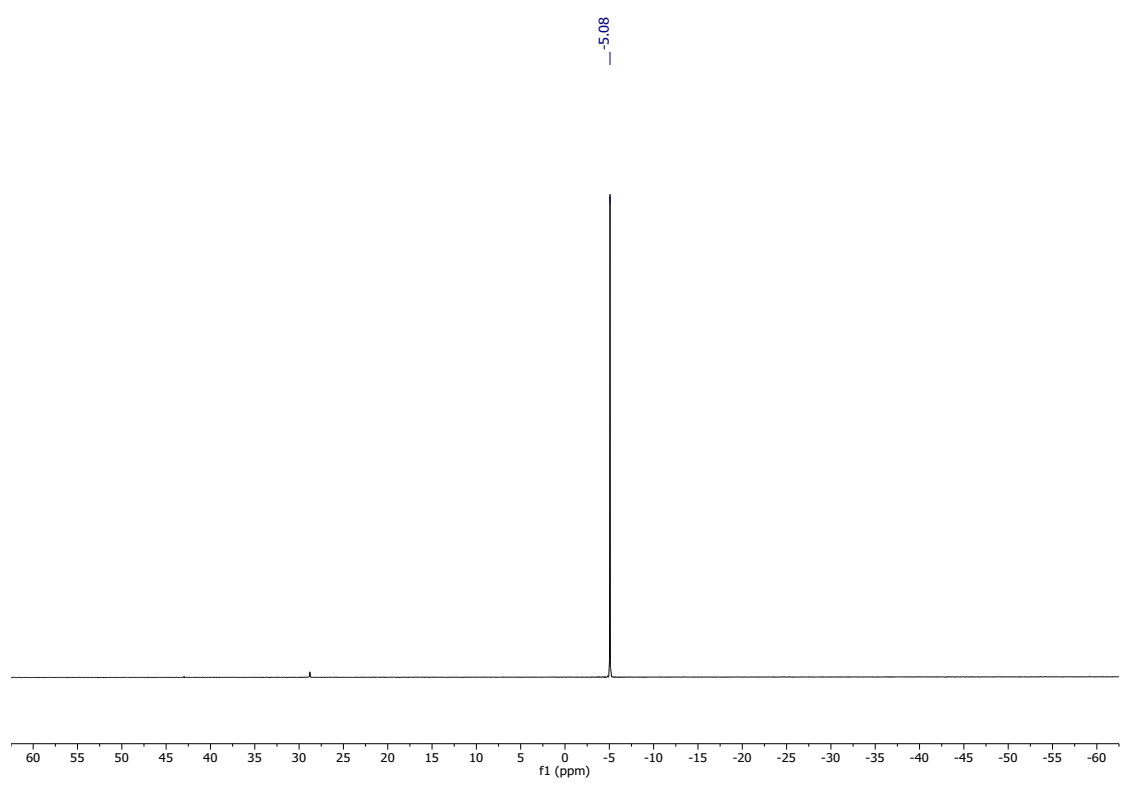



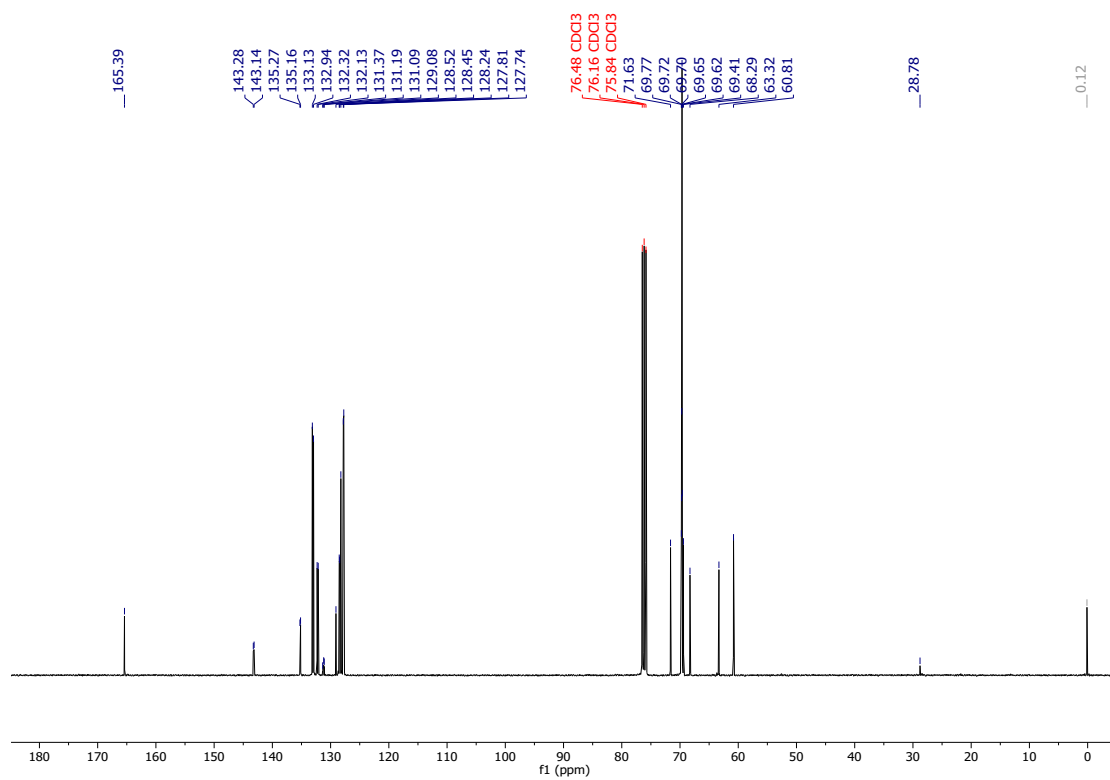

**Figure S1.**  $^1\text{H}$  (top),  $^{31}\text{P}$  (middle),  $^{13}\text{C}$  (bottom) NMR spectra of **1** in  $\text{CDCl}_3$  at RT.

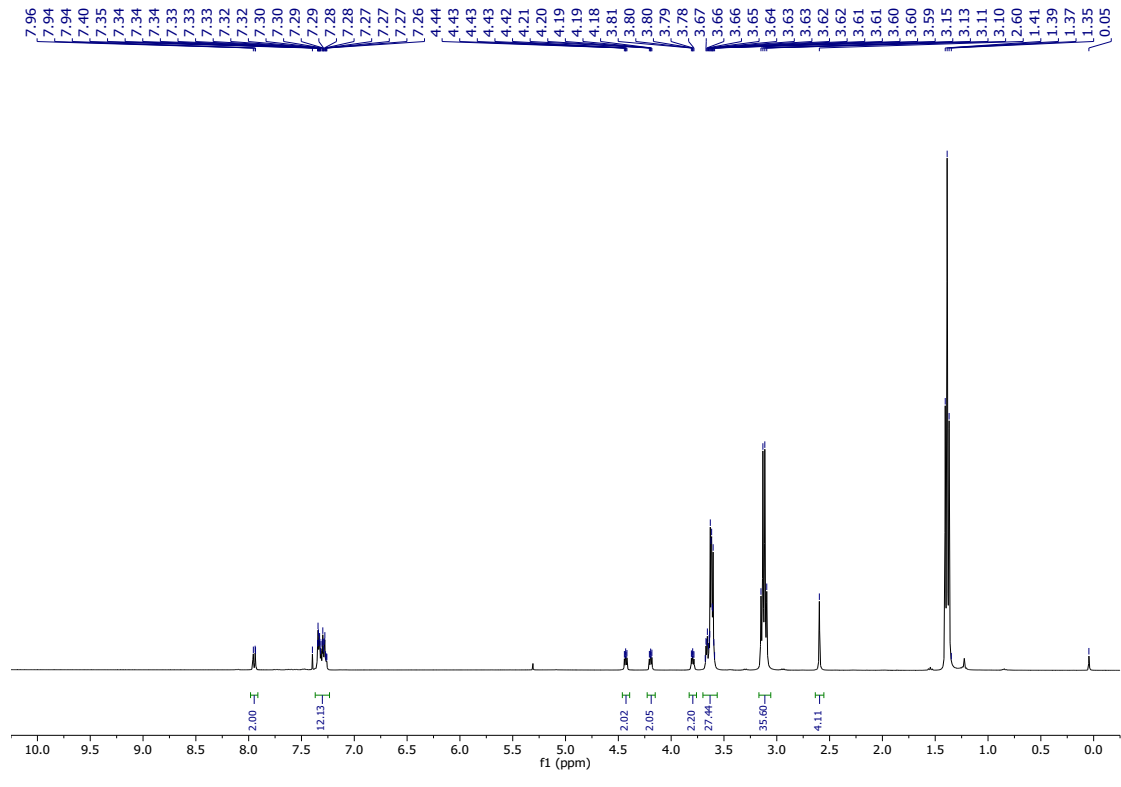

--5.22

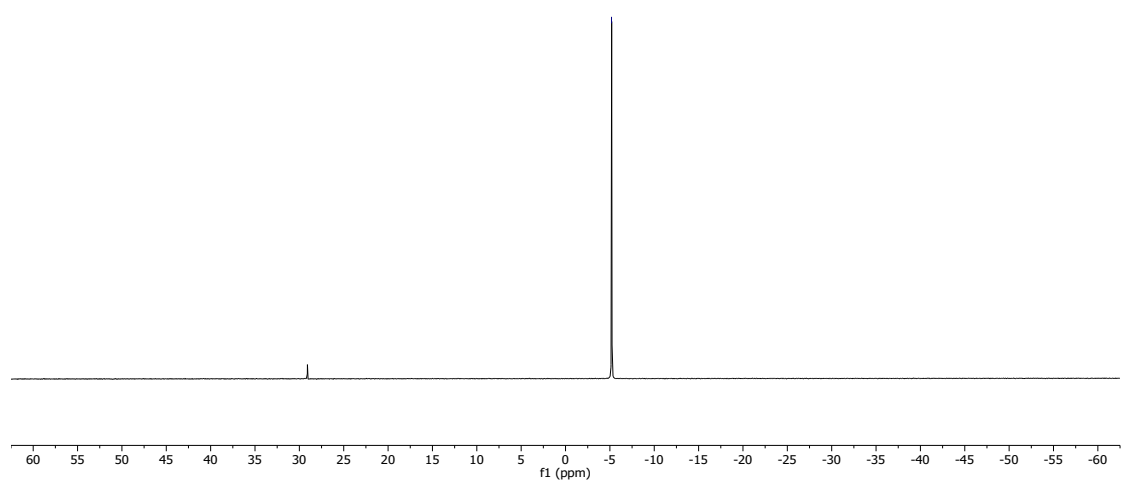

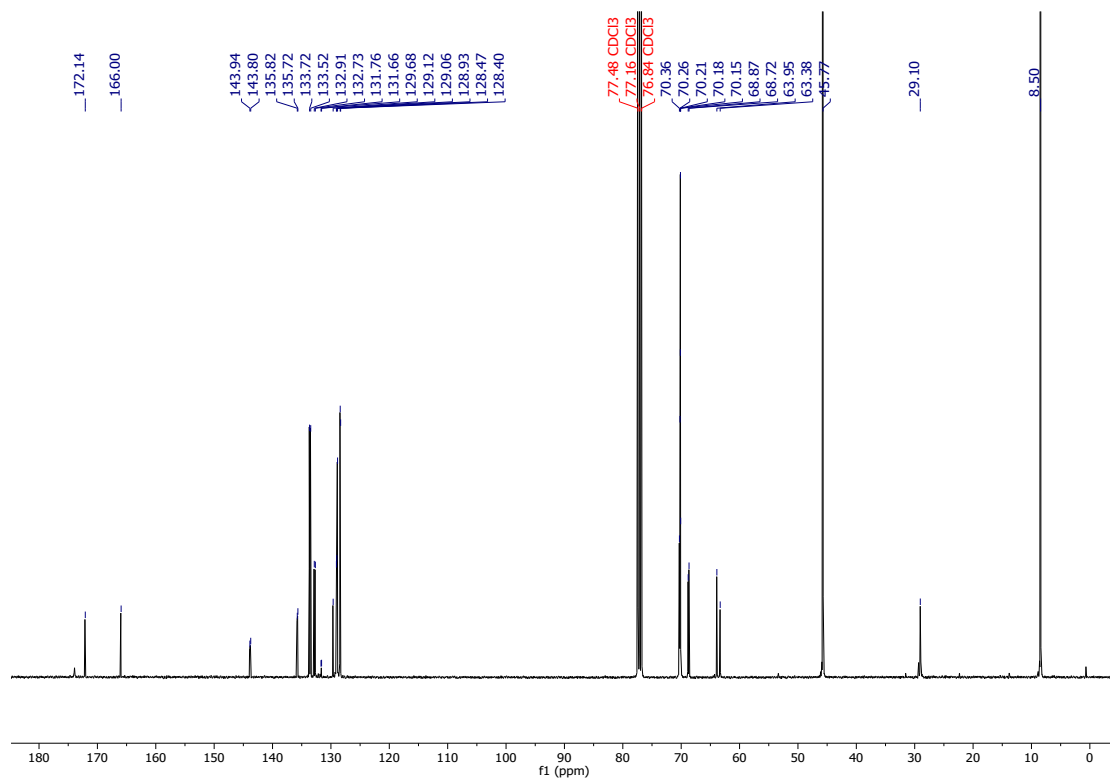

**Figure S2.**  $^1\text{H}$  (top),  $^{31}\text{P}$  (middle),  $^{13}\text{C}$  (bottom) NMR spectra of **2** in  $\text{CDCl}_3$  at RT.

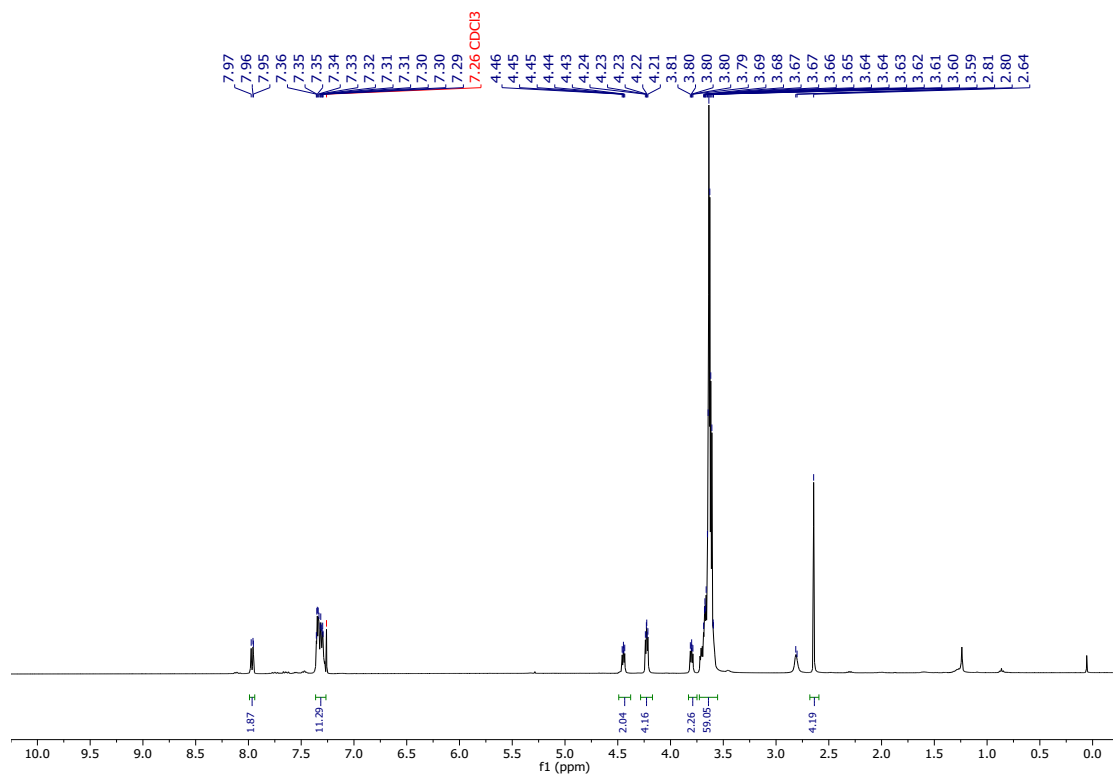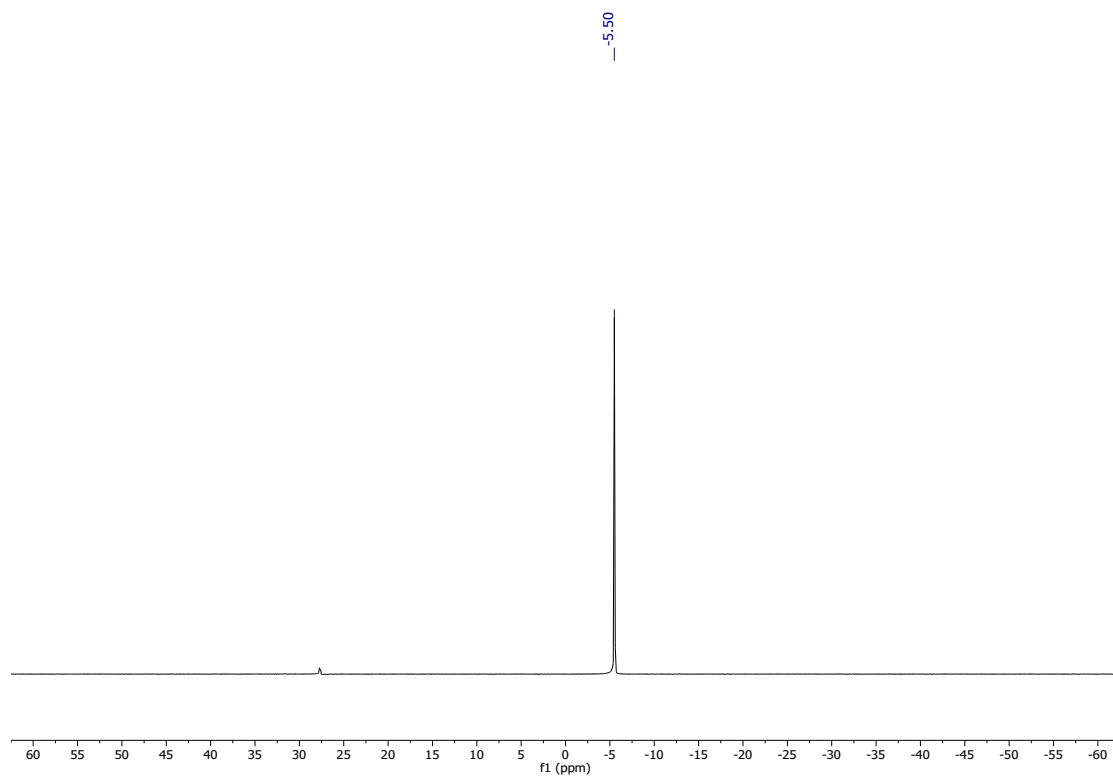

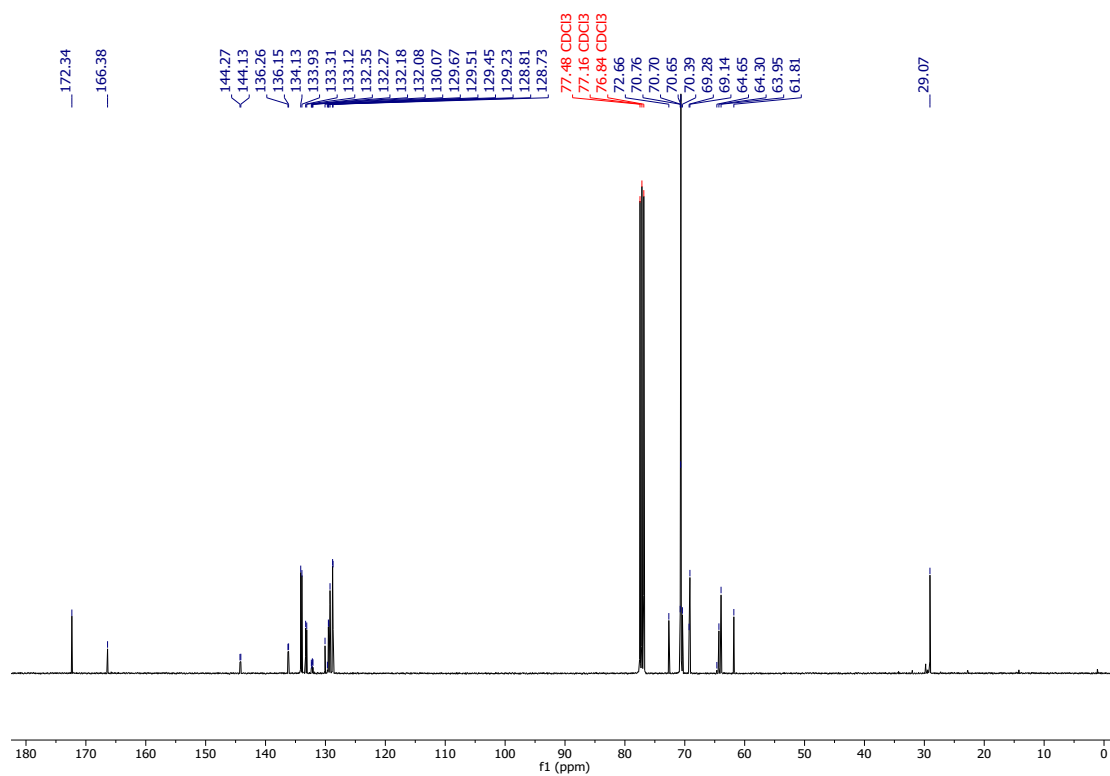

**Figure S3.**  $^1\text{H}$  (top),  $^{31}\text{P}$  (middle),  $^{13}\text{C}$  (bottom) NMR spectra of **3** in  $\text{CDCl}_3$  at RT.

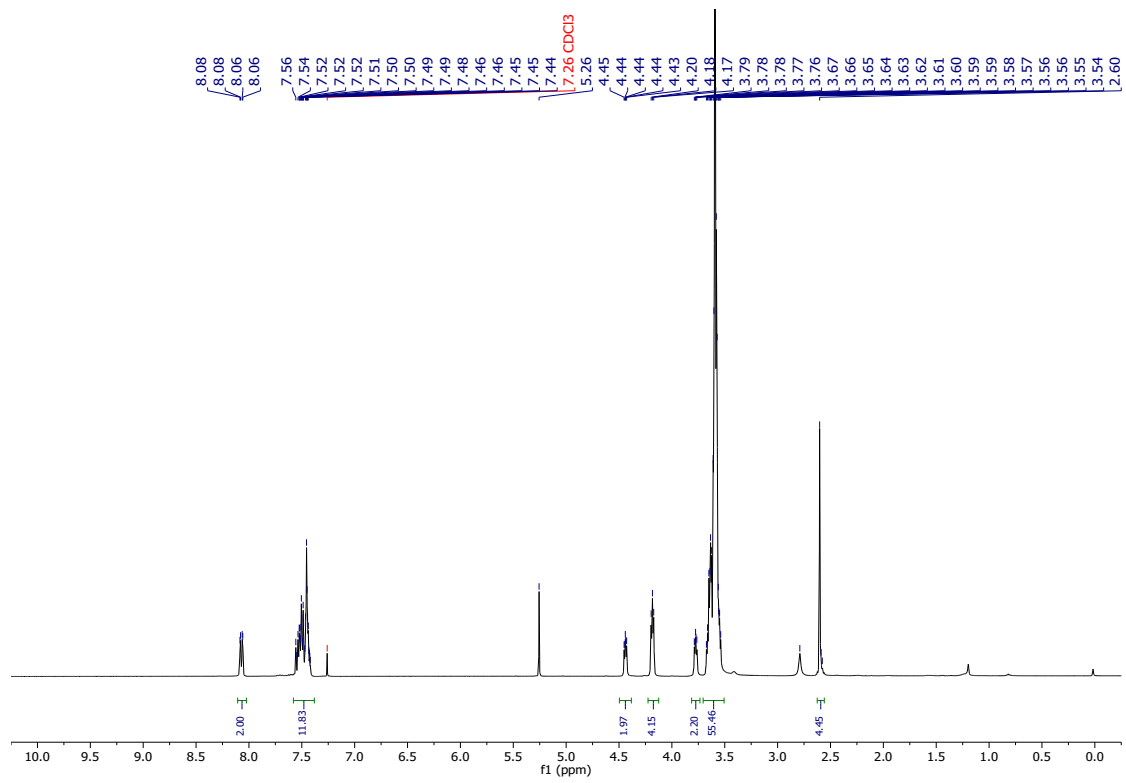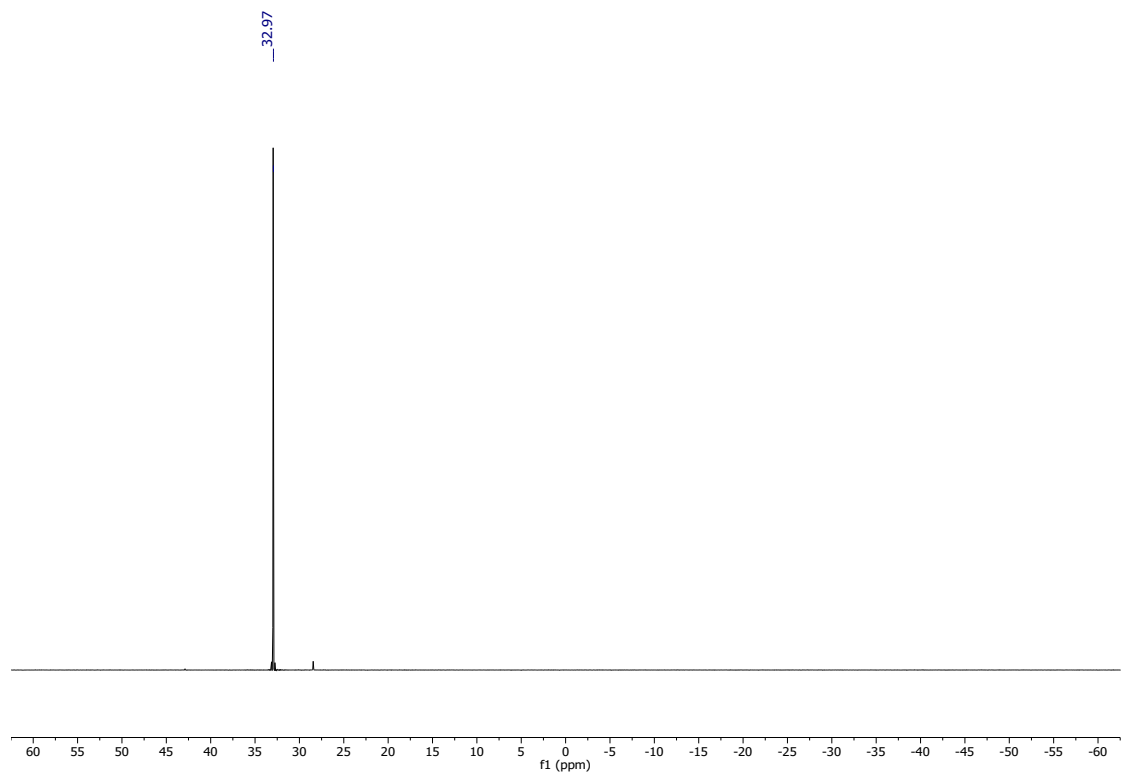

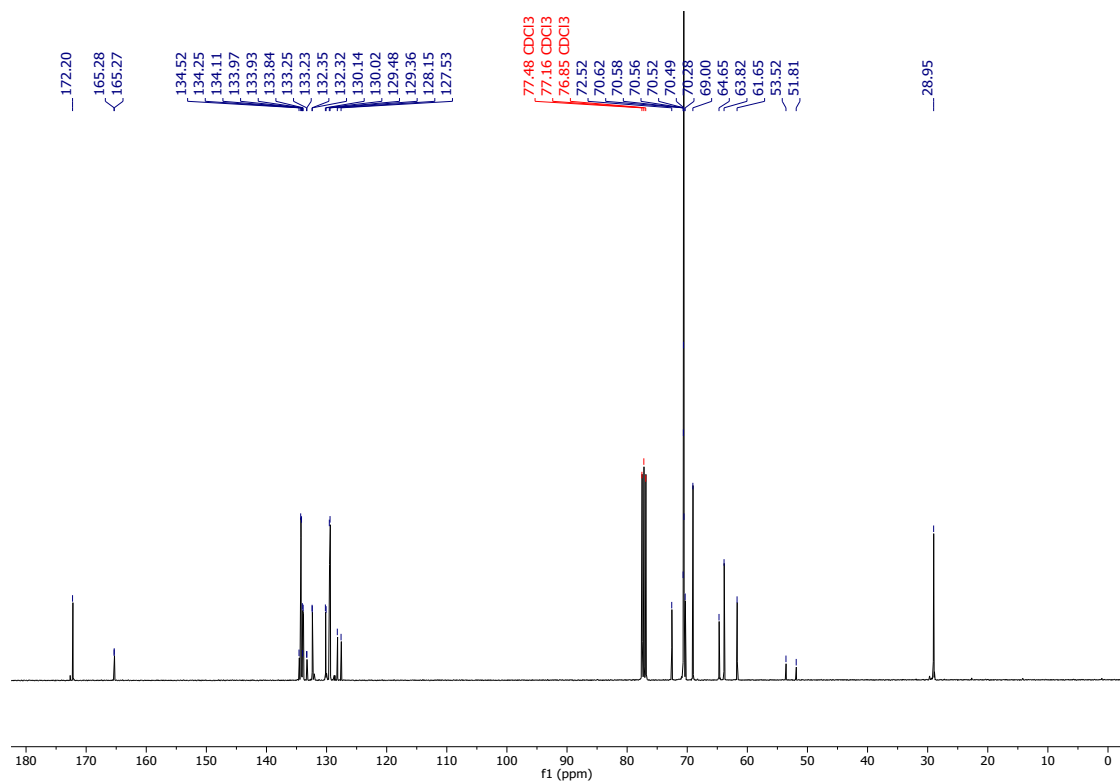

**Figure S4.**  $^1\text{H}$  (top),  $^{31}\text{P}$  (middle),  $^{13}\text{C}$  (bottom) NMR spectra of **4** in  $\text{CDCl}_3$  at RT.

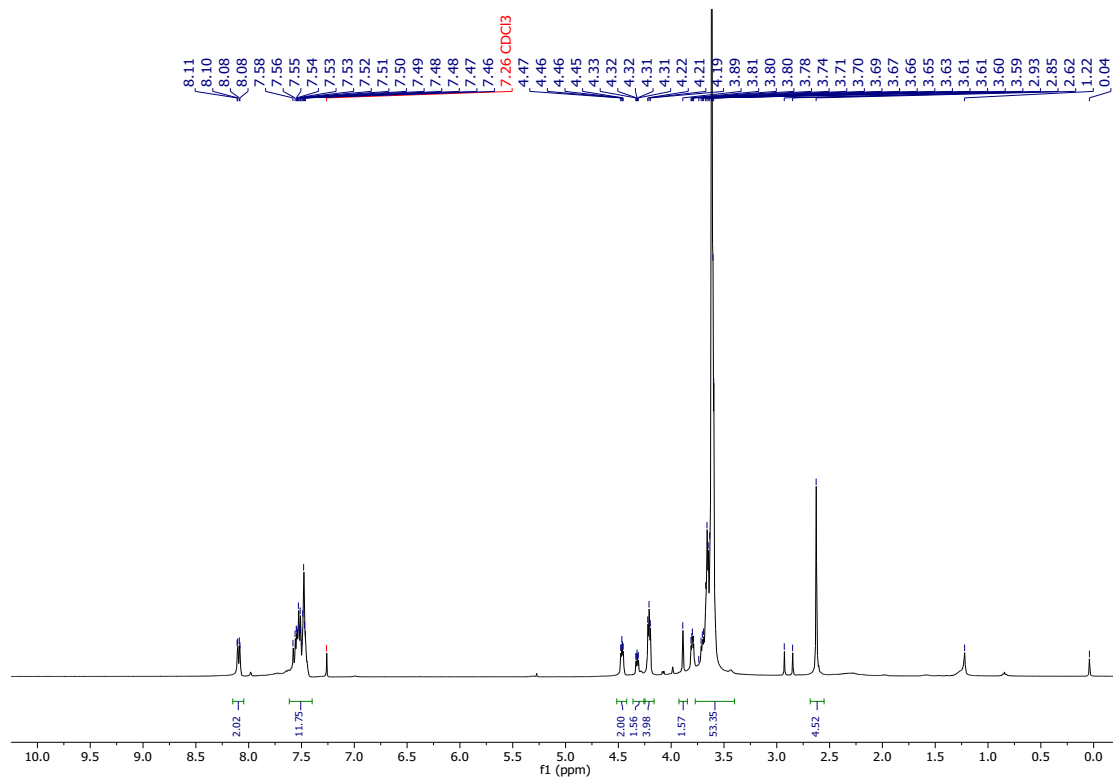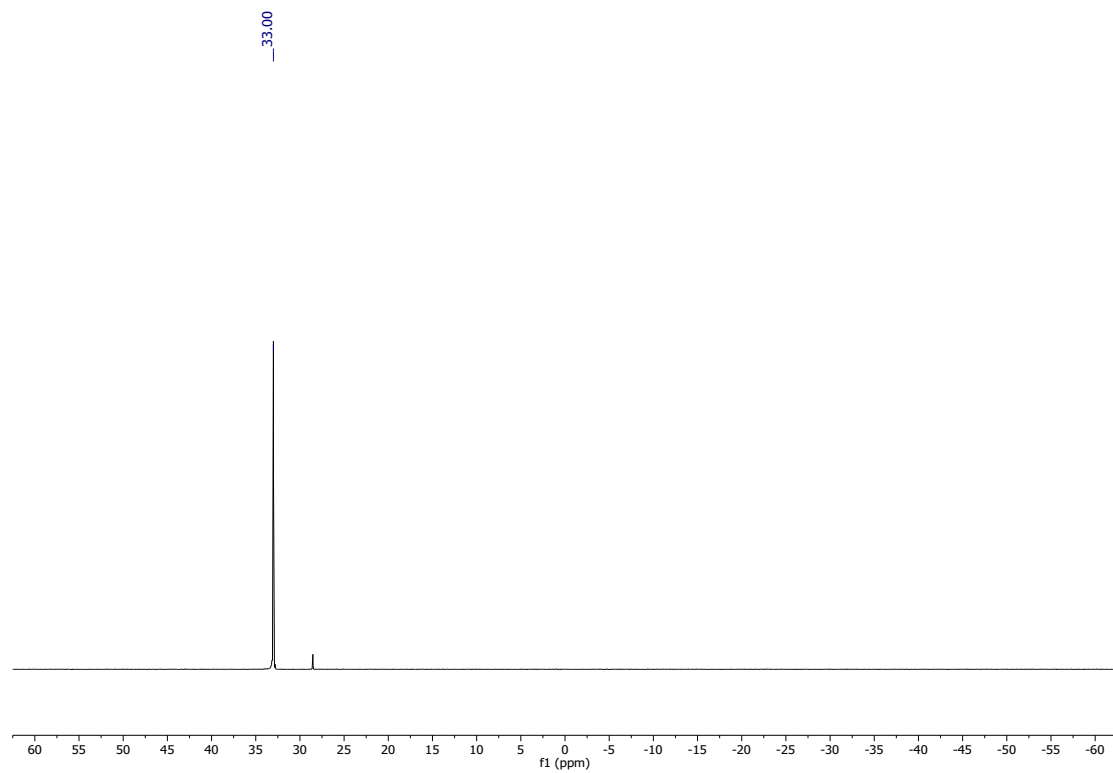



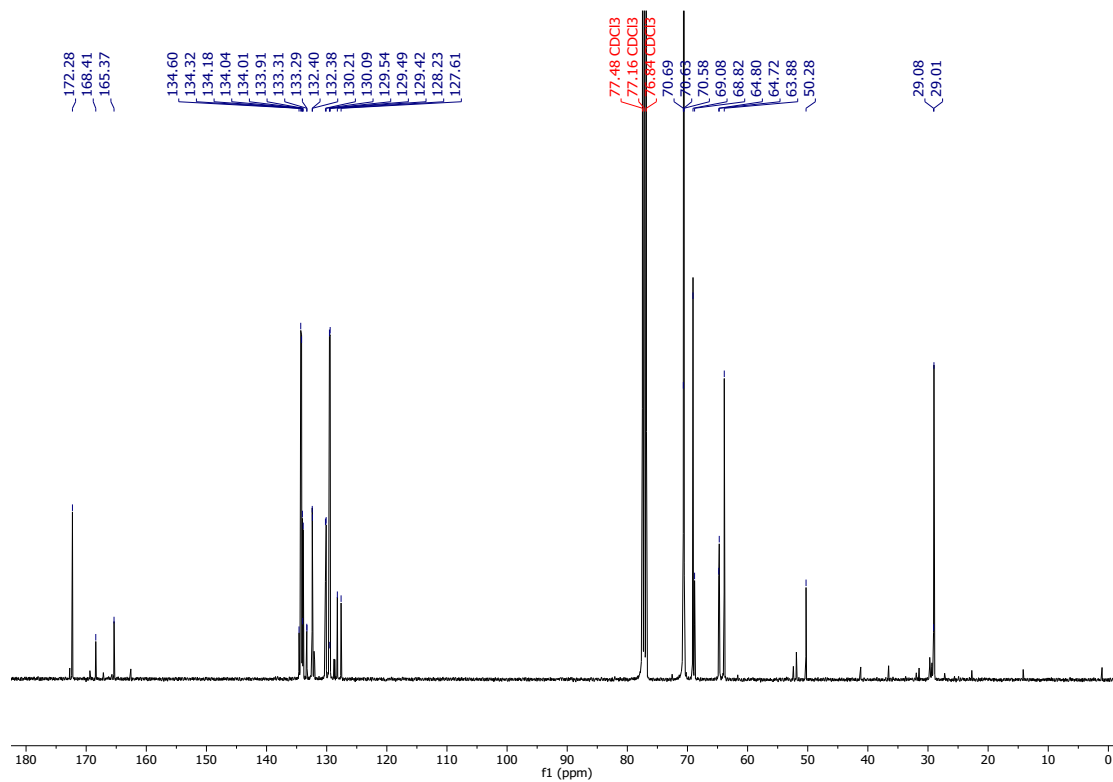

**Figure S5.**  $^1\text{H}$  (top),  $^{31}\text{P}$  (middle),  $^{13}\text{C}$  (bottom) NMR spectra of **5** in  $\text{CDCl}_3$  at RT.

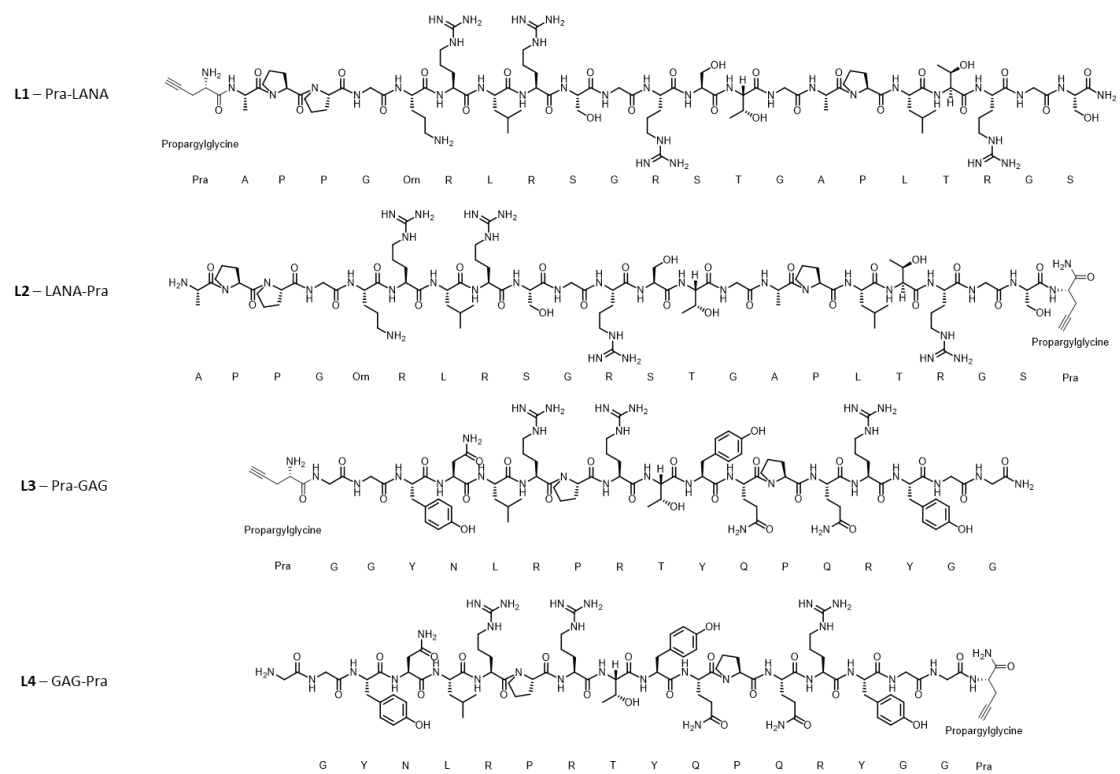

**Figure S6.** Structures of the viral peptides modified with a propargylglycine group (L1–L4).

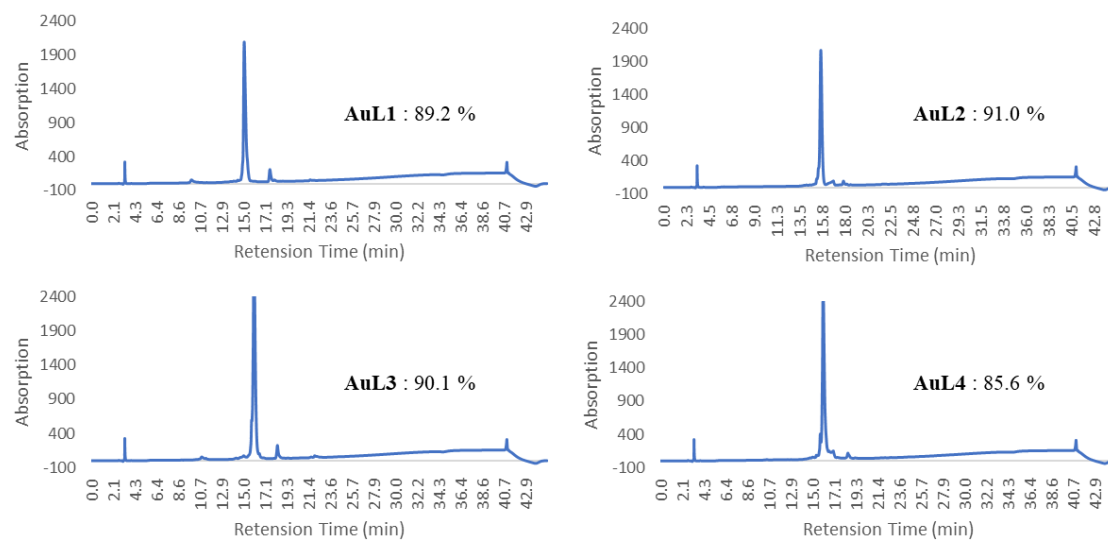

**Figure S7.** HPLC traces for the Au(I)-peptide conjugates: Au-LANA, LANA-Au, Au-GAG and GAG-Au.

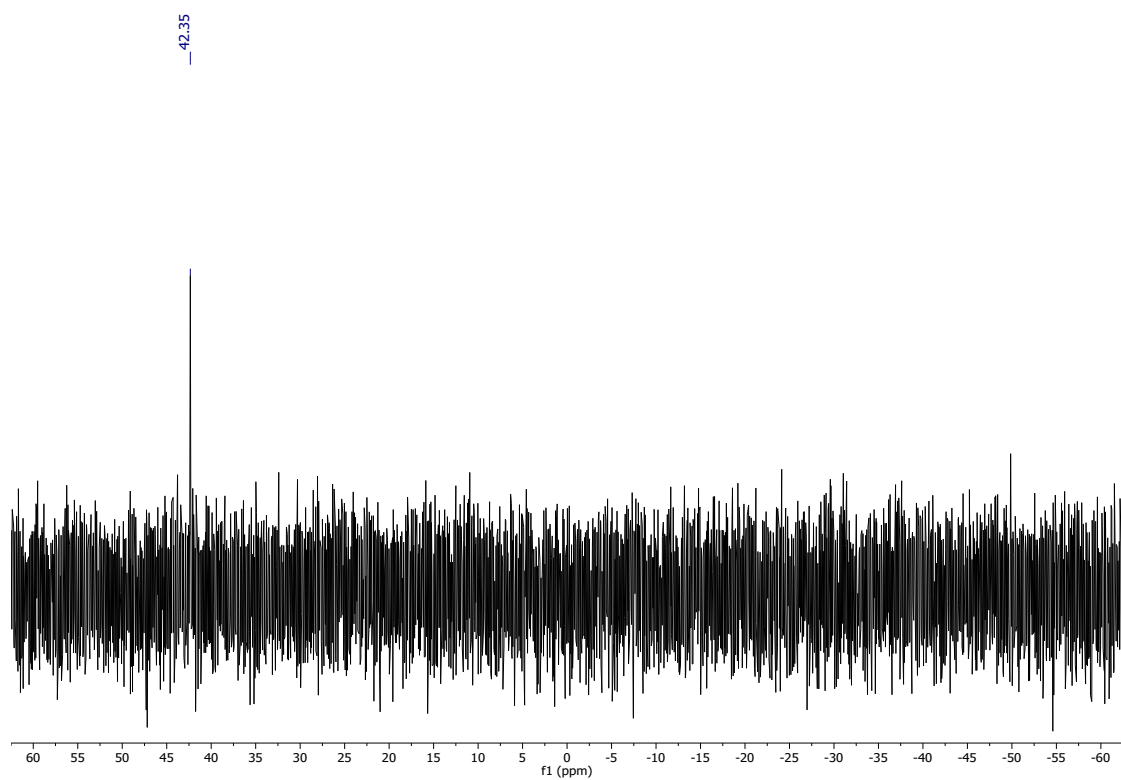

**Figure S8.**  $^{31}\text{P}$  NMR spectrum of Au-LANA in  $\text{D}_2\text{O}$  at RT.

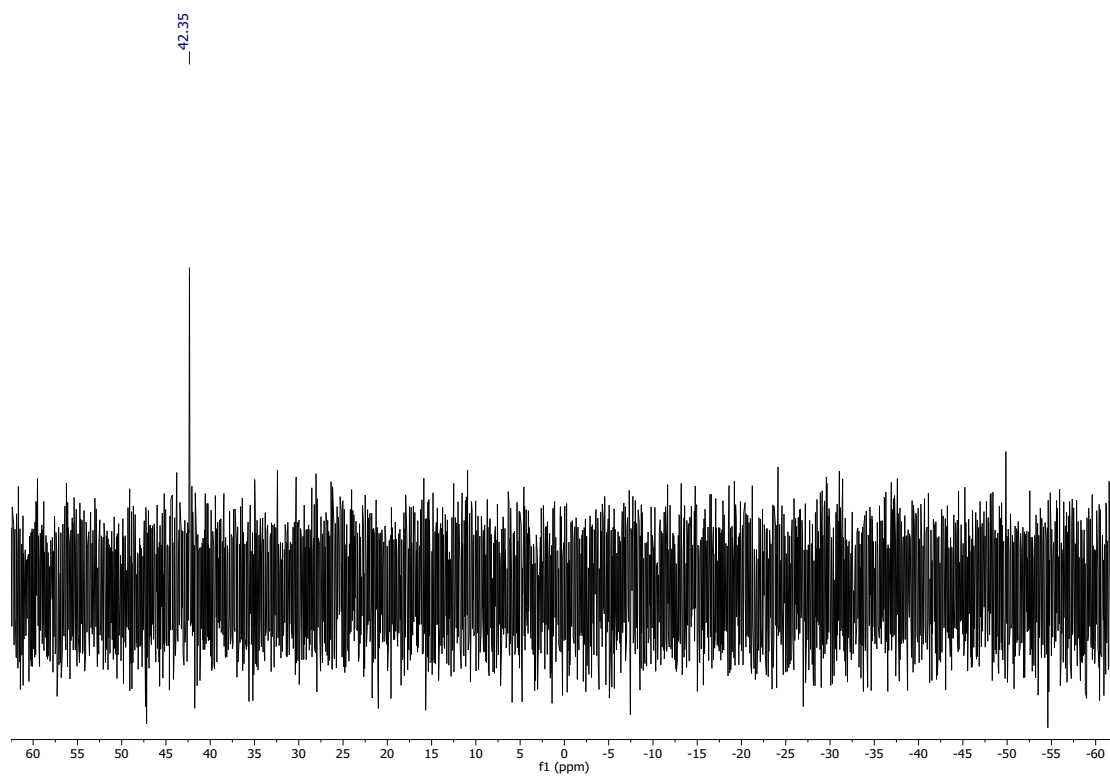

**Figure S9.**  $^{31}\text{P}$  NMR spectrum of LANA-Au in  $\text{D}_2\text{O}$  at RT.

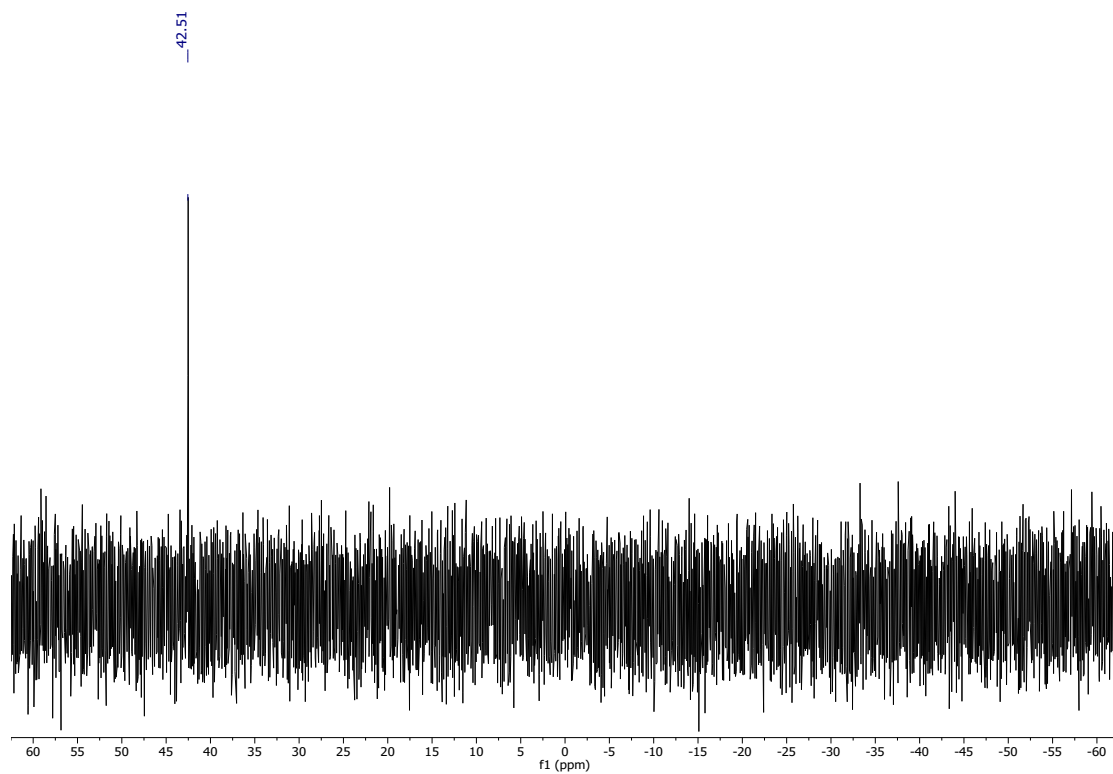

**Figure S10.**  $^{31}\text{P}$  NMR spectrum of Au-GAG in  $\text{D}_2\text{O}$  at RT.

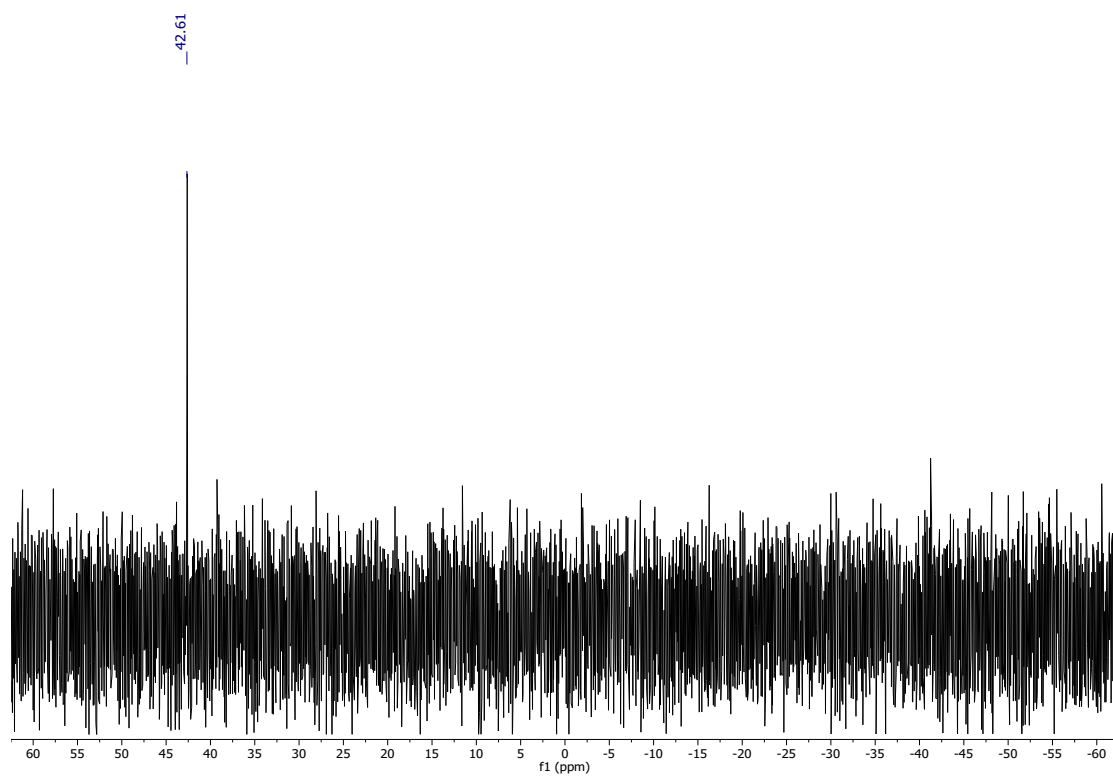

**Figure S11.**  $^{31}\text{P}$  NMR spectrum of GAG-Au in  $\text{D}_2\text{O}$  at RT.

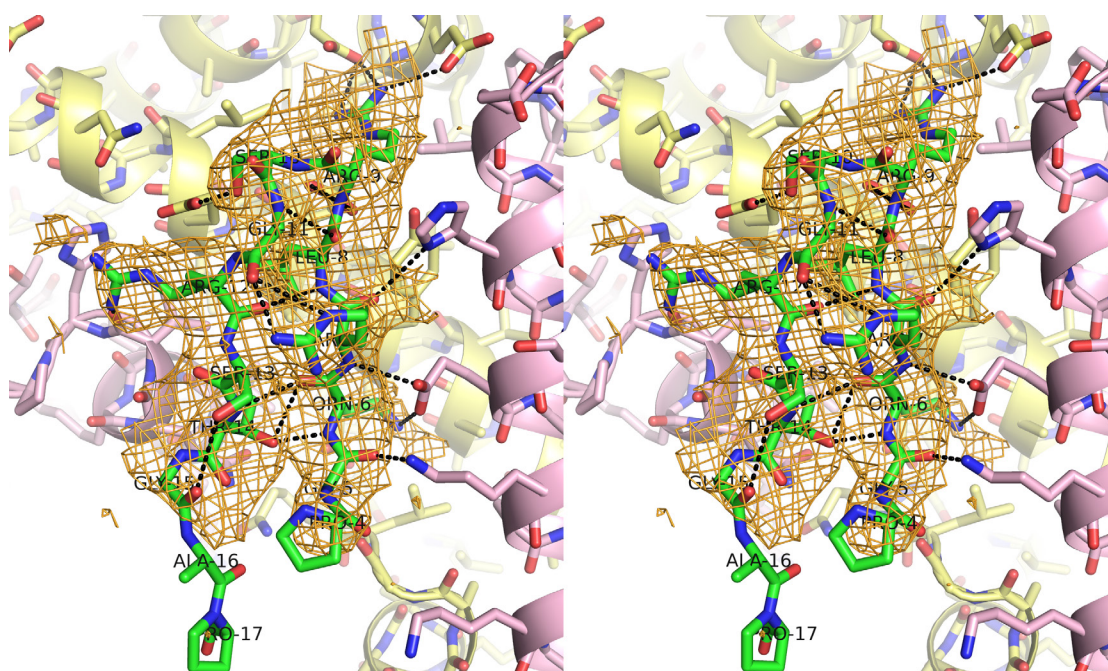

**Figure S12.** Experimental electron density corresponding to the NCP-bound LANA peptide used in the Au(I)-viral peptide conjugates (in stereo view). An  $F_o-F_c$  omit electron density map (orange; contoured at  $2\sigma$ ; prior to inclusion of LANA peptide in the model) in the vicinity of the omitted atoms is superimposed onto the refined model. Histone proteins are shown with a yellow (H2A) and pink (H2B) carbon backbone and the LANA peptide with a bright green carbon backbone. Hydrogen bonds are represented by black dashed lines. The X-ray crystallographic data set stems from a 15-hour incubation of NCP crystals with a 2 mM concentration of a 21-residue LANA peptide engineered with a Met to Orn substitution (at residue position 6): 2-APPGOrnRLRSRSTGAPLTRGS-22. Note that the first two N-terminal and last five C-terminal residues are not visible in the electron density maps and thus only residues 4-PGOrnRLRSRSTGAP-17 are included in the model.



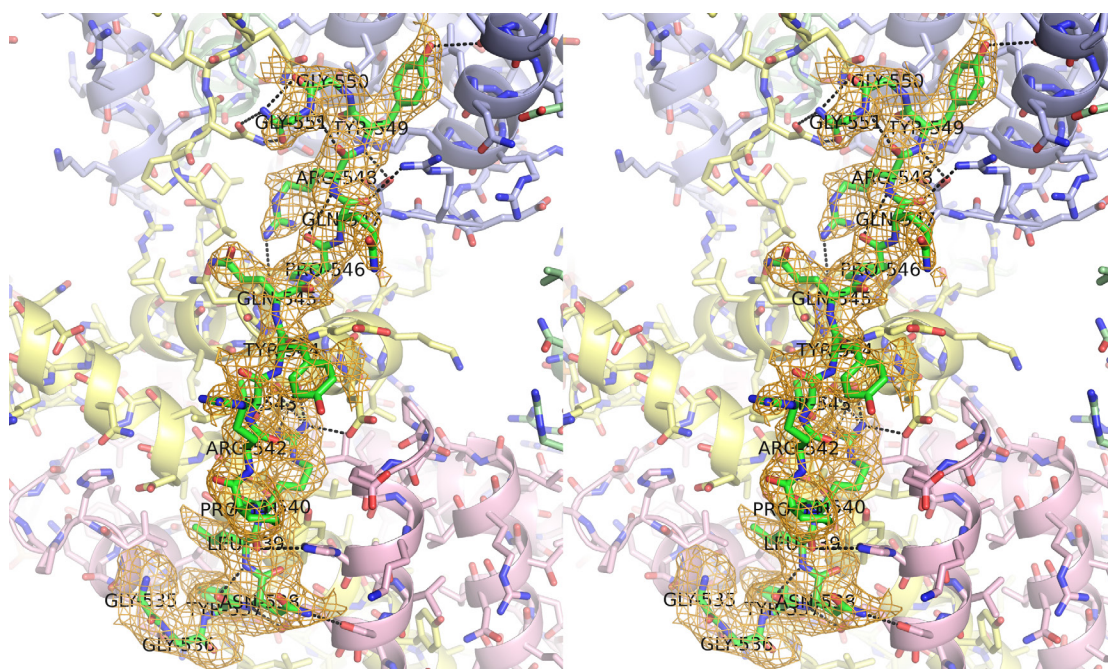

**Figure S13.** Experimental electron density corresponding to the NCP-bound GAG peptide used in the Au(I)-viral peptide conjugates (in stereo view). An  $F_o-F_c$  omit electron density map (orange; contoured at  $2\sigma$ ; prior to inclusion of GAG peptide in the model) in the vicinity of the omitted atoms is superimposed onto the refined model. Histone proteins are shown with a purple (H3), pale green (H4), yellow (H2A), and pink (H2B) carbon backbone and the GAG peptide with a bright green carbon backbone. Hydrogen bonds are represented by black dashed lines. The X-ray crystallographic data set stems from a 29-hour incubation of NCP crystals with a 2 mM concentration of Au-GAG, which comprises the 17-residue GAG peptide: 535-GGYNLRPTYQPQRYGG-551.

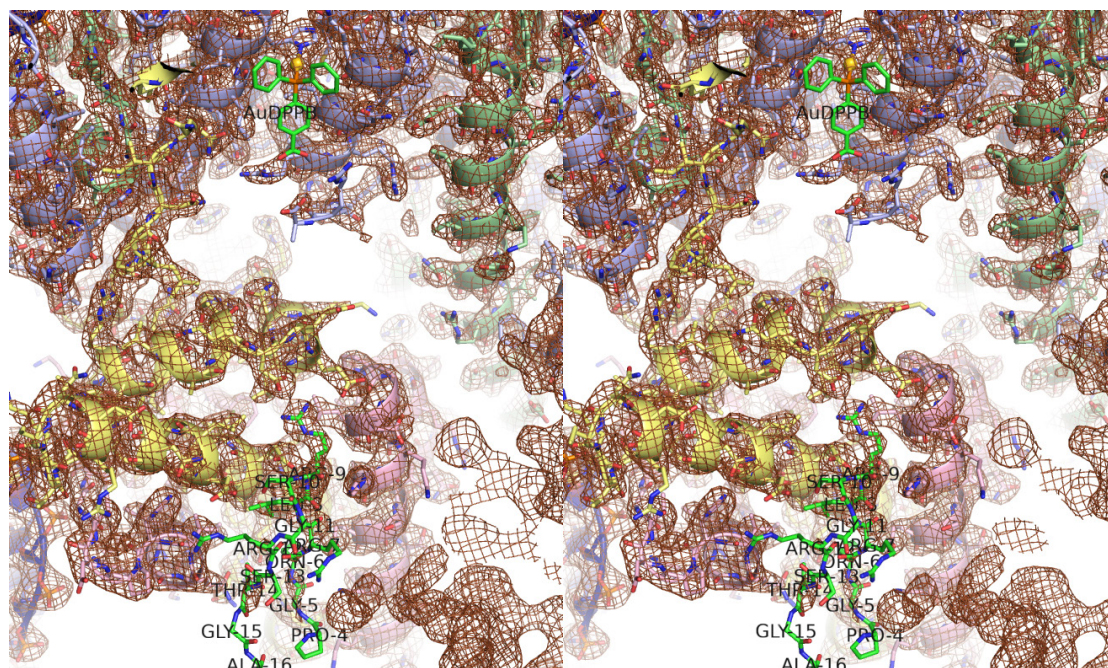

**Figure S14.** Electron density corresponding to the NCP treated with the Au-LANA Au(I)-viral peptide conjugate (in stereo view). A  $2F_o - F_c$  electron density map (brown; contoured at  $1.5\sigma$ ) is superimposed onto the refined model. The Au-LANA adduct (LANA peptide and AuDPPB group) is displayed with a bright green carbon backbone. Histone proteins are shown in purple (H3), pale green (H4), yellow (H2A) and pink (H2B), and DNA strands are orange and dark blue. The X-ray crystallographic data set stems from a 73-hour incubation of NCP crystals with a 1 mM concentration of the Au-LANA conjugate, wherein the 21-residue LANA peptide is engineered with a Met to Orn substitution (at residue position 6): 2-APPGOmRLRSGRSTGAP-LTRGS-22. See Figure 2a for further details, including the experimental electron density associated with the Au-LANA adduct.
